# Supplementary material for: 2020 Reviewers and Guest Associate Editors
Source: Atypon-hosted journal article supplement (doi:10.1287/mnsc.2021.3959), 2021-01-26
Supplement: mnsc.2021.3959.sm1.pdf [file mnsc.2021.3959.sm1.pdf]

# All Reviewers, 2020

Aaltonen, Aleksi, Temple University  
Aase, Knut, Norwegian School of Economics  
Abascal, Maria, New York University  
Abbas, Ali, University of Illinois at Urbana Champaign  
Abdallah, Tarek, Northwestern University  
Abhishek, Vibhanshu, University of California, Irvine  
Abou Nabout, Nadia, Vienna University of Economics and Business  
Abouee-Mehrizi, Hossein, University of Waterloo  
Abraham, Mabel, Columbia Business School  
Abramova, Inna, Massachusetts Institute of Technology  
Acimovic, Jason, Pennsylvania State University  
Adamopoulos, Panagiotis, Emory University  
Addoum, Jawad, Cornell University  
Adhikari, Binay, University of Alabama  
Adhvaryu, Achyuta, University of Michigan  
Adida, Elodie, University of California, Riverside  
Adjerid, Idris, Virginia Polytechnic Institute and State University  
Adner, Rod, Dartmouth College  
Adulyasak, Yossiri, HEC Montréal  
Adusumilli, Karun, University of Pennsylvania  
Afeche, Philipp, University of Toronto  
Aflaki, Arian, University of Pittsburgh  
Aflaki, Sam, HEC Paris  
Agarwal, Nikhil, Massachusetts Institute of Technology  
Agarwal, Sumit, National University of Singapore  
Agarwal, Vikas, Georgia State University  
Agestrom, Jens, Linnaeus University  
Aggarwal, Ishani, Fundação Getulio Vargas  
Aghamolla, Cyrus, University of Minnesota  
Agnew, Julie, College of William & Mary  
Agranov, Marina, California Institute of Technology  
Agrawal, Shipra, Columbia University  
Agrawal, Vishal, Georgetown University  
Aguiar, Luis, University of Zurich  
Ahern, Kenneth, University of Michigan  
Ahn, Dohyun, Chinese University of Hong Kong  
Ahn, Hyun-soo, University of Michigan  
Ahnert, Toni, Bank of Canada  
Ahsen, Mehmet Eren, University of Illinois at Urbana-Champaign  
Ahuja, Vishal, Southern Methodist University  
Ai, Hengjie, University of Minnesota  
Ai, Wei, University of Maryland, College Park  
Aizawa, Naoki, University of Wisconsin-Madison  
Akbarpour, Mohammad, Stanford University

Akbas, Ferhat, University of Illinois at Chicago  
Akey, Pat, University of Toronto  
Akkas, Arzum, Boston University  
Aksin, Zeynep, Koç University  
Alan, Yasin, Vanderbilt University  
Alashoor, Tawfiq, University of Notre Dame  
Albrecht, Brian, University of Minnesota  
Albuquerque, Ana, Boston University  
Aleszczyk, Aleksander, New York University  
Alev, Isil, Boston College  
Alexy, Oliver, Technical University of Munich  
Ali Mohammadi, Yeganeh, Stanford University  
Alimov, Azizjon, City University of Hong Kong  
Alizamir, Saed, Yale University  
Aljafari, Ruba, University of Pittsburgh  
Allain, Marie-Laure, École Polytechnique  
Allee, Kristian, University of Arkansas  
Allen, Eric, University of California, Riverside  
Almeida, Caio, Princeton University  
Alok, Shashwat, Indian School of Business  
Alon, Shiri, Bar-Ilan University  
Aloosh, Arash, NEOMA Business School  
Alsabah, Humoud, Columbia University  
Alston, Mackenzie, Florida State University  
Altmann, Steffen, University of Copenhagen  
Altug, Mehmet, George Mason University  
Al-Ubaydli, Omar, George Mason University  
Alvarez, Fernando, University of Chicago  
Alyakoob, Mohammed, University of Southern California  
Amano, Tomomichi, Harvard Business School  
Ambrose, Brent, Pennsylvania State University  
Ambuehl, Sandro, University of Zurich  
Amihud, Yakov, New York University  
Amir, On, University of California, San Diego  
Amiram, Dan, Tel Aviv University  
Amiraslani, Hami, INSEAD  
Amore, Mario Daniele, Bocconi University  
Amromin, Gene, Federal Reserve Bank of Chicago  
An, Li, Tsinghua University  
Anagol, Santosh, University of Pennsylvania  
Analytis, Pantelis, Cornell University  
Anand, Amber, Syracuse University  
Ananthakrishnan, Uttara, University of Washington  
Anantharaman, Divya, Rutgers University  
Anderson, David, Villanova University  
Anderson, Edward, University of Sydney  
Anderson, Edward, University of Texas  
Anderson, Tracy, Bocconi University

André, Quentin, Erasmus University  
Andrei, Daniel, McGill University  
Andrews, Michael, National Bureau of Economic Research  
Andrews, Spencer, University of North Carolina at Chapel Hill  
Andriani, Pierpaolo, Kedge Business School  
Andrikogiannopoulou, Angie, King's College London  
Andritsos, Dimitrios, HEC Paris  
Angelus, Alexandar, Texas A&M University  
Angerer, Martin, University of Liechtenstein  
Animesh, Animesh, McGill University  
Ansari, Sina, Dartmouth College  
Antill, Sam, Harvard Business School  
Antonakis, John, University of Lausanne  
Anttila-Hughes, Jesse, University of San Francisco  
Aouad, Ali, London Business School  
Apestequia, Jose, Pompeu Fabra University  
Apffelstaedt, Arno, Universitat zu Koln  
Appel, Gil, University of Southern California  
Appel, Ian, Boston College  
Apt, Jay, Carnegie Mellon University  
Aragon, George, Arizona State University  
Araman, Victor, American University of Beirut  
Aravindakshan, Ashwin, University of California, Davis  
Archak, Nikolay, New York University  
Ardestani-Jaafari, Amir, McGill University  
Aribarg, Anocha, University of Michigan  
Arif, Salman, University of Minnesota  
Arifoglu, Kenan, University College London  
Arikan, Mazhar, University of Kansas  
Arisoy, Eser, NEOMA Business School  
Arlotto, Alessandro, Duke University  
Arnio, Ashley, Texas State University  
Arnosti, Nick, Stanford University  
Arora, Siddharth, University of Oxford  
Artz, Martin, University of Muenster  
Asadpour, Arash, New York University  
Ascarza, Eva, Columbia Business School  
Aseri, Manmohan, Carnegie Mellon University  
Ashraf, Anik, LMU Munich  
Askin, Noah, INSEAD  
Asparouhova, Elena, University of Utah  
Aspers, Patrik, Uppsala University  
Astashkina, Ekaterina, University of Michigan  
Aswani, Anil, University of California, Berkeley  
Atan, Zumbul, Eindhoven University of Technology  
Atanasov, Pavel, Pytho LLC  
Atanassov, Julian, University of Nebraska  
Atasoy, Hilal, Rutgers University

Atmaz, Adem, Purdue University  
Attanasi, Giuseppe, University of Nice Sophia Antipolis  
Attema, Arthur, Erasmus University  
Audia, Pino, Dartmouth College  
Augenblick, Ned, University of California, Berkeley  
Augustin, Patrick, McGill University  
Ault, Joshua, Arizona State University  
Austin, Robert, Western University  
Avci, Buket, Southern Methodist University  
Aven, Brandy, Carnegie Mellon University  
Avoyan, Ala, Indiana University Bloomington  
Avramov, Doron, IDC Herzliya  
Ayabakan, Sezgin, Temple University  
Ayash, Brian, California Polytechnic State University  
Aydin, Goker, Johns Hopkins University  
Aydinliyim, Tolga, Baruch College  
Aydogan, Ilke, Bocconi University  
Ayvaci, Mehmet, University of Texas at Dallas  
Ayyagari, Meghana, George Washington University  
Azar, Jose, University of Navarra  
Azevedo, Eduardo, University of Pennsylvania  
Azmat, Ghazala , Sciences Po  
Baardman, Lennart, University of Michigan  
Babar, Yash, University of Wisconsin-Madison  
Babenko, Ilona, Arizona State University  
Babii, Andrii, University of North Carolina at Chapel Hill  
Babina, Tania, Columbia University  
Backus, Mathew, Columbia Business School  
Badarinza, Cristian, National University of Singapore  
Badoer, Dominique, University of Illinois at Chicago  
Baek, Jiye, Korea University  
Baer, Mike, Arizona State University  
Baert, Stijn, Ghent University  
Bag, Parimal, National University of Singapore  
Bagchi, Aniruddha, Kennesaw State University  
Bagh, Adib, University of Kentucky  
Baghai, Ramin, Stockholm School of Economics  
Bahaj, Saleem, Bank of England  
Bai, Jennie, Georgetown University  
Bai, John (Jianqiu), Northeastern University  
Baik, Bok, Seoul National University  
Bailey, Warren, Cornell University  
Baird, Aaron, Georgia State University  
Baker, Steven, University of Virginia  
Bakshi, Gurdip, Temple University  
Bakshi, Nitin, University of Utah  
Bala, Hillol, Indiana University  
Bala, Ram, Santa Clara University

Balachander, Subramanian, University of California, Riverside  
Balachandran, Sarath, London Business School  
Balafoutas, Loukas, University of Innsbruck  
Balasubramaniam, Vimal, University of Warwick  
Balasubramanian, Natarajan, Syracuse University  
Baldauf, Markus, University of British Columbia  
Bali, Turan G., Georgetown University  
Balkundi, Prasad, University at Buffalo-The State University of New York  
Ball, George, Indiana University  
Ball, Michael, University of Maryland  
Ball, Ryan, University of Michigan  
Balloch, Cynthia, London School of Economics and Political Science  
Balsam, Steven, Temple University  
Balseiro, Santiago, Columbia University  
Balsmeier, Benjamin, Eidgenossische Technische Hochschule Zurich  
Balyuk, Tetyana, Emory University  
Ban, Gah-Yi, University of Maryland, College Park  
Bandi, Chaitanya, Northwestern University  
Banerjee, Mitali, HEC Paris  
Banerjee, Ryan, Bank for International Settlements  
Banerjee, Sayan, University of North Carolina at Chapel Hill  
Banerjee, Suman, Stevens Institute of Technology  
Banuri, Sheheryar , University of East Anglia  
Bao, Chenzhang , Oklahoma State University  
Bao, Jack, University of Delaware  
Bao, Te, Nanyang Technological University  
Bapna, Sofia, University of Minnesota  
Baqae, David, University of California, Los Angeles  
Barach, Moshe, University of Minnesota  
Baranchuk, Nina, University of Texas at Dallas  
Barankay, Iwan, University of Pennsylvania  
Barasch, Alixandra, University of Pennsylvania  
Barber, Benjamin, IE Business School  
Barboni, Giorgia, University of Warwick  
Barbulescu, Roxana, HEC Paris  
Bar-Gill, Sagit, Massachusetts Institute of Technology  
Barnett, Michael D, Arizona State University  
Baron, Opher, University of Toronto  
Barr, Abigaill , University of Nottingham  
Barr, Paul, Dartmouth College  
Barras, Laurent, McGill University  
Barrero, Jose Maria, Instituto Tecnológico Autónomo de México  
Barrios, John, University of Chicago  
Barron, Daniel, Northwestern University  
Barron, Kai, Social Science Center Berlin  
Barroso, Pedro, University of New South Wales  
Barseghyan, Levon, Cornell University  
Barth, Daniel, U.S. Department of the Treasury

Bartik, Alexander , University of Illinois at Chicago  
Bartley, Timothy, Washington University in St Louis  
Bartram, Sohnke, London Business School  
Baruch, Shmuel, University of Rome Tor Vergata  
Basker, Emek, United States Census Bureau  
Baslandze, Salome, Federal Reserve Bank of Atlanta  
Bassamboo, Achal, Northwestern University  
Basse, Guillaume, Stanford University  
Bastani, Hamsa, University of Pennsylvania  
Basu, Amiya, Syracuse University  
Batt, Bob, University of Wisconsin-Madison  
Battalio, Robert , University of Notre Dame  
Battiston, Diego , University of Edinburgh  
Battiston, Stefano, University of Zurich  
Bauer, Daniel, University of Wisconsin-Madison  
Bauer, Michael, University of Hamburg  
Bauer, Michal, Charles University  
Bauman, Konstantin, Temple University  
Baumann, Oliver, University of Southern Denmark  
Bavafa, Hessam, University of Wisconsin-Madison  
Baylis, Patrick, University of British Columbia  
Becher, David, Drexel University  
Beck, Amanda, Georgia State University  
Beck, Thorsten, Tilburg University  
Becker, Joshua, University College London  
Becker-Peth, Michael, Erasmus University  
Bedford, David, University of Technology Sydney  
Bedre-Defolie, Ozlem, ESMT Berlin  
Beer, Ruth, Indiana University  
Begley, Taylor, Washington University in St Louis  
Behrer, Patrick, Stanford University  
Belavina, Elena, Cornell University  
Bellamy, Marcus, Boston University  
Bellemare, Charles, Laval University  
Bellos, Ioannis, George Mason University  
Bellucci, Emilia, Deakin University  
Belo, Frederico, INSEAD  
Belo, Rodrigo, Erasmus University  
Belot, Michele, University of Edinburgh  
Bena, Jan, University of British Columbia  
Ben-David, Itzhak, Ohio State University  
Bender, Mark, University of South Florida  
Beneish, Daniel, Indiana University  
Benetton, Matteo, University of California, Berkeley  
Benjamin, Daniel, University of Southern California  
Benjamin, Victor, Arizona State University  
Benmelech, Efraim, Northwestern University  
Ben-Ner, Avner, University of Minnesota

Bennett, Benjamin, Tulane University  
Bennett, Victor, Duke University  
Benoit, Sylvain, Paris Dauphine University  
Ben-Rephael, Azi, Rutgers University  
Benson, Alan, University of Minnesota  
Benton, Richard, University of Illinois at Urbana-Champaign  
Benzell, Seth, Massachusetts Institute of Technology  
Berbeglia, Gerardo, University of Melbourne  
Bercovitz, Janet, University of Colorado  
Bereskin, Frederick, University of Missouri  
Berg, Tobias, Frankfurt School of Finance & Management  
Bergemann, Dirk, Yale University  
Bergemann, Patrick, University of California, Irvine  
Bergenholtz, Carsten, Aarhus University  
Berger, Allen, University of South Carolina  
Berger, Elizabeth, Cornell University  
Bergner, Anouk, University of St. Gallen  
Bergstresser, Daniel, Brandeis University  
Berkouwer, Susanna, University of Pennsylvania  
Berlin, Noemi, French National Centre for Scientific Research  
Berling, Peter, Lund University  
Berman, Ron, University of Pennsylvania  
Berman, Yonatan, City University of New York  
Bernhardt, Daniel, University of Illinois  
Bernstein, Asaf, University of Colorado Boulder  
Bernstein, Ethan, Harvard Business School  
Bernstein, Shai, Harvard University  
Berrera, Cathy, Prysm Group  
Berson, Yair, Bar-Ilan University  
Beshears, John, Harvard Business School  
Beuselink, Christof, IESEG School of Management  
Beyer, Anne, Stanford University  
Bhagwat, Vineet, George Washington University  
Bhamra, Harjoat, Imperial College London  
Bhanot, Syon, Swarthmore College  
Bharadwaj, Sundar, University of Georgia  
Bhaskar, Umang, Tata Institute of Fundamental Research  
Bhaskaran, Sreekumar, Southern Methodist University  
Bhatia, Sudeep, University of Pennsylvania  
Bhatt, Anjali, Harvard Business School  
Bhui, Rahul, Harvard University  
Biais, Bruno, HEC Paris  
Bianchi, Daniele, University of Warwick  
Bianchi, Milo, Toulouse School of Economics  
Bidkhor, Hoda, University of Pittsburgh  
Bijvank, Marco, University of Calgary  
Bikard, Michael, INSEAD  
Bilgin, Baler, Koç University

Billett, Matthew, Indiana University  
Billinger, Stephan, University of Southern Denmark  
Billings, Mary, New York University  
Bimpikis, Kostas, Stanford University  
Binning, Kevin, University of Pittsburgh  
Bird, Andrew, Carnegie Mellon University  
Birge, John, University of Chicago  
Biro, Peter, Hungarian Academy of Sciences  
Birru, Justin, Ohio State University  
Bish, Douglas, Virginia Polytechnic Institute and State University  
Bish, Ebru, Virginia Polytechnic Institute and State University  
Bishop, Robert, Coca Cola Company  
Biswas, Shirsho, University of Washington  
Bizjak, John, Texas Christian University  
Bjarnadóttir, Margrét, University of Maryland, College Park  
Black, Dirk, University of Nebraska-Lincoln  
Black, Ines, Duke University  
Black, Lamont, DePaul University  
Blackburne, Terrence, Oregon State University  
Blake, Daniel, IE Business School  
Blanes i Vidal, Jordi, London School of Economics and Political Science  
Blankespoor, Elizabeth , University of Washington  
Blasco, Andrea, Harvard University  
Blavatsky, Pavlo, Montpellier Business School  
Bleier, Alexander, Frankfurt School of Finance & Management  
Blevins, Jason, Ohio State University  
Bloch, Francis, École Polytechnique  
Blocher, Jesse, Vanderbilt University  
Blohm, Ivo, University of St. Gallen  
Blomfield, Michael, London Business School  
Bloomfield, Matt, University of Pennsylvania  
Blumrosen, Liad, Hebrew University of Jerusalem  
Bo, Inacio, University of York  
Bochkay, Khrystyna, University of Miami  
Bode, Christiane, Imperial College London  
Bodnaruk, Andriy, University of Illinois  
Bodoh-Creed, Aaron, University of California, Berkeley  
Boehnke, Jorn, University of Chicago  
Bogouslavsky, Vincent , Boston College  
Boissay, Frederic, Bank for International Settlements  
Boivie, Steven, Texas A&M University  
Bojd, Behnaz, University of California, Irvine  
Bolandnazar, Mohammadreza, Columbia University  
Bollen, Nicolas, Vanderbilt University  
Bollinger, Bryan, New York University  
Bolori, Alireza, Michigan State University  
Bonaime, Alice, University of Arizona  
Bond, Brittany, Massachusetts Institute of Technology

Bondi, Tommoso, Cornell Tech  
Bonfim, Diana, Banco de Portugal  
Bonsall, Samuel, Pennsylvania State University  
Borgonovo, Emanuele, Bocconi University  
Borisov, Alexander, University of Cincinnati  
Borochin, Paul, University of Miami  
Borovicka, Jaroslav, New York University  
Borri, Nicola, Libera Università Internazionale degli Studi Sociali Guido Carli  
Bosch-Rosa, Ciril, University College of Financial Studies  
Bose, Subhonmesh, University of Illinois at Urbana-Champaign  
Botelho, Tristan, Massachusetts Institute of Technology  
Boudreau, Laura, Columbia University  
Boulatov, Alex, HSE University  
Bourveau, Thomas, Columbia Business School  
Boutillier, Justin, University of Wisconsin-Madison  
Bouvard, Matthieu, McGill University  
Bouwens, Jan, University of Amsterdam  
Bouyssou, Denis, French National Centre for Scientific Research  
Bouzzine, Yassin, Leuphana University of Lüneburg  
Bova, Francesco, University of Toronto  
Boyabatli, Onur, Singapore Management University  
Boyer, Brian, Brigham Young University  
Boysen, Andrew, University of North Carolina at Chapel Hill  
Boyson, Nicole, Northeastern University  
Bozanic, Zahn, Florida State University  
Bracha, Anat, Federal Reserve Bank of Boston  
Bradley, Daniel, University of South Florida  
Bradlow, Eric, University of Pennsylvania  
Braguinsky, Serguey, University of Maryland, College Park  
Brahm, Francisco, London Business School  
Bramsfeld, Kosha, University of Toronto  
Brandimarte, Laura, University of Arizona  
Brands, Raina, London Business School  
Brandts, Jordi, Barcelona Graduate School of Economics  
Bratten, Brian, University of Kentucky  
Braun, Michael, Southern Methodist University  
Braverman, Anton, Northwestern University  
Bravo, Fernanda, University of California, Los Angeles  
Bray, Robert, Northwestern University  
Brecko, Kristina, University of Rochester  
Breitmoser, Yves, Bielefeld University  
Brennan, Thomas, Harvard University  
Brenner, Lyle, University of Florida  
Brent, Dan, Pennsylvania State University  
Breon-Drish, Bradyn, University of California, San Diego  
Bretscher, Lorenzo, London Business School  
Breuer, Thomas, Fachhochschule Vorarlberg  
Breugem, Matthijs, Collegio Carlo Alberto

Brinkerink, Jaspee, Free University of Bozen-Bolzano  
Briscoe, Forrest, Pennsylvania State University  
Brochet, Francois, Boston University  
Brockman, Paul, Lehigh University  
Brogaard, Jonathan, University of Utah  
Brohman, Kathryn, Queen's University  
Brolley, Michael, Wilfrid Laurier University  
Brookins, Philip, University of South Carolina  
Brooks, James, Virginia Commonwealth University  
Broomell, Stephen, Carnegie Mellon University  
Brown, Alexander, Texas A&M University  
Brown, David, Duke University  
Brown, David, University of Arizona  
Brown, Gordon, University of Warwick  
Brown, James, Iowa State University  
Brownback, Andy, University of Arkansas  
Brownlees, Christian, Pompeu Fabra University  
Bruche, Max, Humboldt University of Berlin  
Brugler, James, University of Melbourne  
Bruguier, Tony, Google Inc  
Brunetti, Celso, Federal Reserve Board  
Bruns, Stephan, University of Hasselt  
Brusa, Francesca, Temple University  
Bryan, Kevin, University of Toronto  
Bryzgalova, Svetlana, London Business School  
Bu, Jinzhi, Massachusetts Institute of Technology  
Buchak, Greg, Stanford University  
Bucher Kuhnen, Tabea, Leibniz Centre for European Economic Research  
Buchheim, Lukas, Ludwig-Maximilians-University Munich  
Buchholz, Nick, Princeton University  
Budescu, David, Fordham University  
Buehlmaier, Matthias, University of Hong Kong  
Buell, Ryan, Harvard Business School  
Bumpensanti, Pornpawee, Georgia Institute of Technology  
Bunn, Derek, London Business School  
Burkett, Justin, Georgia Institute of Technology  
Burks, Jeffrey, University of Notre Dame  
Burnap, Alex, Yale University  
Burt, Ron, University of Chicago  
Burtch, Gordon, University of Minnesota  
Burton, M. Diane, Cornell University  
Busenbark, John, University of Notre Dame  
Buser, Thomas, University of Amsterdam  
Buss, Adrian, INSEAD  
Bustamante, Maria, University of Maryland, College Park  
Butler, Jeffrey, University of California, Merced  
Button, Patrick, Tulane University  
Buyalskaya, Anastasia, California Institute of Technology

Byard, Donal, Baruch College  
Bybee, Leland, Yale University  
Byun, Heejung, Purdue University  
Byzalov, Dmitri, Temple University  
Cadman, Brian, University of Utah  
Cahliková, Jana, Max Planck Institute for Tax Law and Public Finance  
Cai, Cexun (Jeff), National University of Singapore  
Cai, Gangshu, Santa Clara University  
Cai, Jie, Drexel University  
Cai, Ning, Hong Kong University of Science and Technology  
Cakici, Nusret, Fordham University  
Cakici, Ozden, American University  
Caldieraro, Fabio, FGV EBAPE - Rio de Janeiro  
Call, Andrew, Arizona State University  
Calluzzo, Paul, Queen's University  
Calmon, Andre, INSEAD  
Calvano, Emilio, University of Naples  
Calvo, Eduard, IESE Business School  
Cameron, Kellas, Boston University  
Campbell, Benjamin, Ohio State University  
Campbell, John L., University of Georgia  
Campbell, T. Colin, Carl H. Lindner College of Business  
Campero, Santiago, University of Toronto  
Candogan, Ozan, University of Chicago  
Cao, Dan, Georgetown University  
Cao, Huan, University of Maryland  
Cao, Jie, Chinese University of Hong Kong  
Cao, Xinyu, New York University  
Cao, Ying, Chinese University of Hong Kong  
Cao, Yufeng, Georgia Institute of Technology  
Carlson, Kurt, College of William & Mary  
Carlson, Murray, University of British Columbia  
Carlsson, John, University of Southern California  
Carnabuci, Gianluca, European School of Management and Technology  
Carnahan, Seth, Washington University in St. Louis  
Carter, Mary, Boston College  
Carvalho, Daniel, Indiana University Bloomington  
Casas Arce, Pablo, Arizona State University  
Cascino, Stefano, London School of Economics and Political Science  
Caskey, Judson, University of California, Los Angeles  
Caskurlu, Tolga, University of Amsterdam  
Cason, Timothy, Purdue University  
Cassar, Lea, University of Zurich  
Cassell, Cory, University of Arkansas  
Castelo, Noah, University of Alberta  
Castillo, Juan Camilo, Stanford University  
Castro, Francisco, University of California, Los Angeles  
Catalan, Mario, International Monetary Fund

Catherine, Sylvain, University of Pennsylvania  
Catillon, Maryaline, Harvard University  
Causholli, Monika, University of Kentucky  
Ceccagnoli, Marco, Georgia Institute of Technology  
Cederburg, Scott, University of Arizona  
Cedergren, Matthew, Santa Clara University  
Celier, Claire, University of Toronto  
Cen, Ling, Chinese University of Hong Kong  
Cen, Xiao, Texas A&M University  
Cerqueiro, Geraldo, Universidade Católica Portuguesa  
Cespa, Giovanni, Cass Business School  
Céspedes, Jacelly , University of Minnesota, Twin Cities  
Cettolin, Elena, Tilburg University  
Chabakauri, Georgy, London School of Economics and Political Science  
Chabi-Yo, Fousseni, University of Massachusetts Amherst  
Chaieb, Ines, University of Geneva  
Chaigneau, Pierre, Queen's University  
Chakraborty, Anujit, University of California, Davis  
Chakraborty, Indraneel, University of Miami  
Chakraborty, Soudipta, Duke University  
Chalak, Karim, University of Virginia  
Chalmers, John, University of Oregon  
Chan, Carri, Columbia Business School  
Chan, Jason, University of Minnesota  
Chan, Tian, Emory University  
Chan, Timothy, University of Toronto  
Chandrasekaran, Aravind, Ohio State University  
Chaney, Allison, Duke University  
Chang, Bo Young, Bank of Canada  
Chang, Briana, University of Wisconsin-Madison  
Chang, Daphne, University of Michigan  
Chang, Xin, Nanyang Technological University  
Chang, Young Bong, Sungkyunkwan University  
Chaplinsky, Susan, University of Virginia  
Chapman, Kimball, Washington University in St Louis  
Charness, Gary, University of California, Santa Barbara  
Chatain, Olivier, HEC Paris  
Chatterjee, Chirantan, Indian Institute of Management Ahmedabad  
Chattopadhyay, Akash , University of Toronto  
Chaturvedi, Aadhaar, University of Auckland  
Chava, Sudheer, Georgia Institute of Technology  
Chaves, Isaias, Northwestern University  
Chehrazi, Naveed, University of Texas at Austin  
Chen, Jun, Renmin University of China  
Chen, An, University of Ulm  
Chen, Boxiao, University of Illinois at Chicago  
Chen, Chen, University of Chicago  
Chen, Christopher, Indiana University Bloomington

Chen, Clara, University of Illinois at Urbana-Champaign  
Chen, Guoli, INSEAD  
Chen, Hailiang, University of Hong Kong  
Chen, Honghui, University of Central Florida  
Chen, Hua, University of Georgia  
Chen, Huaizhi, University of Notre Dame  
Chen, Jeff, Texas Christian University  
Chen, Jiafeng, Harvard University  
Chen, Jianqing, University of Texas at Dallas  
Chen, Kay-Yut, University of Texas at Arlington  
Chen, Li, Cornell University  
Chen, Likai, Washington University in St Louis  
Chen, Long, George Mason University  
Chen, Louis, Naval Postgraduate School  
Chen, Min, Florida International University  
Chen, Min, George Mason University  
Chen, Mingliu, Columbia University  
Chen, Mo, University of Maryland, College Park  
Chen, Nan, Chinese University of Hong Kong  
Chen, Ningyuan, University of Toronto  
Chen, Peng-Chu, University of Hong Kong  
Chen, Qi, Duke University  
Chen, Qi (George), London Business School  
Chen, Rachel, University of California, Davis  
Chen, Roy, Aachen University  
Chen, Roy, University of Michigan  
Chen, Shi, University of Washington  
Chen, Shuping, University of Texas at Austin  
Chen, Tao, Nanyang Technological University  
Chen, Wei, University of Arizona  
Chen, Wei, University of Kansas  
Chen, Xi, New York University  
Chen, Xi, Virginia Polytechnic Institute and State University  
Chen, Xia, Singapore Management University  
Chen, Xiaowei, Nankai University  
Chen, Xin, University of Illinois at Urbana-Champaign  
Chen, Yang, Queen's University  
Chen, Yi, ShanghaiTech University  
Chen, Ying, National University of Singapore  
Chen, Ying-Ju, Hong Kong University of Science and Technology  
Chen, Yiwei, Singapore University of Technology and Design  
Chen, Yong, Texas A&M University  
Chen, Zhi, City University of Hong Kong  
Chen, Zhihong, Hong Kong University of Science and Technology  
Chen, Zhiyao, Chinese University of Hong Kong  
Chen, Zhuo, Tsinghua University  
Cheng, Aaron, London School of Economics and Political Science  
Cheng, Agnes, Hong Kong Polytechnic University

Cheng, Jianqiang, University of Arizona  
Cheng, Lin, University of Arizona  
Cheng, Mandy, University of New South Wales  
Cheng, Mei, University of Arizona  
Cheng, Si, Chinese University of Hong Kong  
Cheng, Terence, University of Adelaide  
Chernenko, Sergey, Purdue University  
Cheung, Stephen, University of Sydney  
Cheung, Wang Chi, National University of Singapore  
Chevalier-Roignant, Benoit, King's College London  
Chew, Soo Hong, National University of Singapore  
Cheyre, Cristobal, Cornell University  
Chhaochharia, Vidhi, University of Miami  
Chia, Liu Ee, National University of Singapore  
Chib, Siddhartha, Washington University in St Louis  
Childers, David, Carnegie Mellon University  
Chiles, Bennett, Columbia Business School  
Chinco, Alex, University of Illinois at Urbana-Champaign  
Chintapalli, Prashant, Indian Institute of Management Bangalore  
Chiou, Lesley, Occidental College  
Chiu, Jonathan, Bank of Canada  
Chiu, W. Henry, University of Manchester  
Cho, Daegon, Korea Advanced Institute of Science and Technology  
Cho, Thummim, London School of Economics and Political Science  
Chod, Jiri, Boston College  
Choi, Darwin, Chinese University of Hong Kong  
Choi, Emily, University of Texas at Dallas  
Choi, Hana, University of Rochester  
Choi, Hyun-Soo, Korea Advanced Institute of Science and Technology  
Choi, Jaewon, University of Illinois at Urbana-Champaign  
Choi, Jongwoon, University of Wisconsin-Madison  
Choi, Joonkyu, Federal Reserve Board  
Choi, JungHo, Stanford University  
Choi, Ki-Soon, Massachusetts Institute of Technology  
Choi, Tsan-Ming, Hong Kong Polytechnic University  
Choi, W. Jason, Rutgers University  
Chondrakis, George, Ramon Llull University  
Choo, Eugene, Yale University  
Chou, Cheng, University of Leicester  
Chou, Mabel, National University of Singapore  
Choudhary, Vivek, INSEAD Asia Campus  
Choudhury, Prithwiraj, Harvard Business School  
Christensen, Dane, University of Oregon  
Christensen, Tim, New York University  
Christin, Nicolas, Carnegie Mellon University  
Chu, Leon, University of Southern California  
Chu, Yongqiang, University of North Carolina at Charlotte  
Chua, Yeow Hwee, National University of Singapore

Chugh, Dolly, New York University  
Chun, So Yeon, INSEAD  
Chung, Doug, Harvard Business School  
Chung, Kee, State University of New York at Buffalo  
Chung, Kevin, University of Wisconsin-Madison  
Chung, Wilbur, University of Maryland, College Park  
Chuprinin, Oleg, University of New South Wales  
Chychyla, Roman, University of Miami  
Cianciaruso, Davide , HEC Paris  
Cicero, David, Auburn University  
Cici, Gjergji, University of Kansas  
Cil, Eren, University of Oregon  
Ciocan, Florin, INSEAD  
Cire, Andre, University of Toronto  
Claeskens, Gerda, KU Leuven  
Clark, Jessica, University of Maryland, College Park  
Clark, Jonathan, Pennsylvania State University  
Clement, Jeff, University of Minnesota  
Clement, Julien, INSEAD  
Clifford, Chris, University of Kentucky  
Clifford, Christopher, University of Kentucky  
Clithero, John , University of Oregon  
Coffman, Katherine, Harvard Business School  
Cohen Mohliver, Aharon, London Business School  
Cohen, Andrew, University of Massachusetts Amherst  
Cohen, Asaf, University of Michigan  
Cohen, Daniel, Texas A&M University  
Cohen-Hillel, Tamar, Massachusetts Institute of Technology  
Cohn, Alain, University of Michigan  
Cohn, Jonathan, University of Texas at Austin  
Colak, Ahmet, Clemson University  
Coles, Jeffery, University of Utah  
Collard, Fabrice, Toulouse School of Economics  
Colliard, Jean-Edouard, HEC Paris  
Collier, Benjamin, Temple University  
Collis, Avinash, University of Texas at Austin  
Colombo, Stefano, Università Cattolica del Sacro Cuore  
Colonnelli, Emanuele, University of Chicago  
Columbus, Simon, University of Copenhagen  
Combe, Julien, École Polytechnique  
Comerton-Forde, Carole , University of New South Wales  
Compiani, Giovanni, University of California, Berkeley  
Comprix, Joseph, Syracuse University  
Cong, Will , Cornell University  
Conlon, Chris, New York University  
Conti, Annamaria, HEC University of Lausanne  
Conti, Raffaele, Católica Lisbon School of Business & Economics  
Contigiani, Andrea, Ohio State University

Cookson, J. Anthony, University of Colorado Boulder  
Cooper, William, University of Minnesota  
Copat, Rafael, University of Texas at Dallas  
Corgnet, Brice, Emylon Business School  
Corhay, Alexandre, University of Toronto  
Corlu, Canan, Boston University  
Cornaggia, Kimberly, Pennsylvania State University  
Cornelius, Philipp, Erasmus University  
Cornwall, Gary, Bureau of Economic Analysis  
Correia, Maria, London School of Economics and Political Science  
Corritore, Matthew , McGill University  
Cortes, Gustavo, University of Florida  
Cortes, Kristle, University of New South Wales  
Cosguner, Koray, Indiana University Bloomington  
Costello, Anna, University of Michigan  
Cotofan, Maria, London School of Economics and Political Science  
Courty, Pascal, University of Victoria  
Cowgill, Bo, Columbia University  
Craig, Nathan, Ohio State University  
Crama, Pascale, Singapore Management University  
Crane, Alan, Rice University  
Cready, Bill, University of Texas at Dallas  
Creal, Drew, University of Notre Dame  
Crisuolo, Paola, Imperial College London  
Croce, Mariano Massimiliano, Bocconi University  
Crockett, Sean, Baruch College  
Cronin, Matthew, George Mason University  
Crook, Jonathan, University of Edinburgh  
Crosby, John, University of Maryland, College Park  
Crosignani, Matteo, Federal Reserve Bank New York  
Crotty, Kevin, Rice University  
Crouzet, Nicolas, Northwestern University  
Cryder, Cynthia, Washington University in St. Louis  
Cui, Hailong, University of Southern California  
Cui, Liyuan, City University of Hong Kong  
Cui, Ruomeng, Emory University  
Cui, Shiliang, Georgetown University  
Cui, Tony Haitao, University of Minnesota  
Cui, Yao, Cornell University  
Cui, Zhenyu, Stevens Institute of Technology  
Cujean, Julien, University of Bern  
Cumming, Douglas, Florida Atlantic University  
Cummings, Rachel, Georgia Institute of Technology  
Cummins, Matthew, Stanford University  
Cunat, Vicente, London School of Economics and Political Science  
Cunha, Igor, University of Kentucky  
Cunningham, Colleen, London Business School  
Curley, Shawn, University of Minnesota

Curtis, Asher, University of Washington  
Custodio, Claudia, Imperial College London  
Cutler, Jennifer, Northwestern University  
Cvijanovic, Dragana, University of North Carolina at Chapel Hill  
Czech, Robert, Bank of England  
Cziraki, Peter, University of Toronto  
Da, Rui, University of Chicago  
Da, Zhi, University of Notre Dame  
D'Acunto, Francesco, Boston College  
Dada, Maqbool, Johns Hopkins University  
D'Agostino, Ramona, University of Rochester  
Dahiya, Sandeep, Georgetown University  
Dahl, Michael S., Aalborg University  
Dahlander, Linus , ESMT Berlin  
Dai, Lili, University of New South Wales  
Dai, Min, National University of Singapore  
Dai, Na, State University of New York at Albany  
Dai, Tinglong, Johns Hopkins University  
Dai, Weijia (Daisy), Purdue University  
Dakhlallah, Diana, McGill University  
Daley, Brendan, Johns Hopkins University  
Dalmia, Prateik, University of Maryland, College Park  
Dambra, Michael, University at Buffalo-The State University of New York  
D'Amour, Alex, Google Inc Boston  
Dana, James, Northeastern University  
Dana, Jason, Yale University  
Danaher, Brett, Chapman University  
Dangl, Thomas, Vienna University of Technology  
Daniels, David, Hong Kong University of Science and Technology  
Daniels, Kaitlin, Washington University in St. Louis  
Dannhauser, Caitlin , Villanova University  
Danz, David, University of Pittsburgh  
Dao, Duy, Haskayne School of Business University of Calgary  
D'Arcy, John, University of Delaware  
Darmouni, Olivier, Columbia University  
Darrough, Masako, Baruch College  
Dasgupta, Sudipto, Chinese University of Hong Kong  
Dass, Nishant , Claremont McKenna College  
David, Klinowski, University of Oxford  
Davidson, Robert, Virginia Polytechnic Institute and State University  
Daviet, Remi, University of Pennsylvania  
Davila, Eduardo, Yale University  
Davis, Andrew, Cornell University  
Davis, Jesse, University of North Carolina  
Davydenko, Sergei, University of Toronto  
Davydiuk, Tetiana, Carnegie Mellon University  
De Angelis, David, Rice University  
de Bettignies, Jean-Etienne, Queen's University

De Bruyn, Arnaud, ESSEC Business School  
de Corniere, Alexandre, Toulouse School of Economics  
De George, Emmanuel, University of Miami  
de Giorgi, Giacomo , University of Geneva  
de Haan, Thomas, Norges Handelshoyskole  
De Haas, Ralph , European Bank for Reconstruction and Development  
de la Rosa, Leonidas, Aarhus University  
De Marco, Filippo, Bocconi University  
de Oliveira, Angela, University of Massachusetts Amherst  
de Quidt, Jon, Stockholm University  
De Reyck, Bert, University College London  
De Silva, Tim, Massachusetts Institute of Technology  
De Simone, Lisa, University of Texas at Austin  
de Treville, Suzanne, University of Lausanne  
de Vaan, Mathijs, University of California, Berkeley  
de Zegher, Joann, Massachusetts Institute of Technology  
Dean, Emma, University of Miami  
Dean, Mark, Columbia University  
DeAngelis, Matthew, Georgia State University  
De-Arteaga, Maria, University of Texas at Austin  
Decamps, Jean-Paul, Toulouse 1 University Capitole  
DeChoudhury, Munmun, Georgia Institute of Technology  
Deck, Cary, University of Arkansas  
Defourny, Boris, Lehigh University  
deHaan, Ed, University of Washington  
Deighton, John, Harvard Business School  
Dekker, Henri, Vrije Universiteit  
Dekker, Rommert, Erasmus University  
Delecourt, Solène, Stanford University  
Delfgaauw, Josse, Erasmus University  
Delgado, Mercedes, Copenhagen Business School  
Delis, Manthos, University of Surrey  
Della Corte, Pasquale, Imperial College London  
Deller, Carolyn, University of Pennsylvania  
Demange, Gabrielle, School for Advanced Studies in the Social Sciences  
Demere, Will, University of Missouri  
Demerjian, Peter, University of Washington  
DeMiguel, Victor, London Business School  
Demirezen, Emre, University of Florida  
den Boer, Arnoud, University of Amsterdam  
Denes, Matthew, Carnegie Mellon University  
Deng, Mingcherng, Baruch College  
Deng, Saiying, Kent State University  
Deng, Tianhu, Tsinghua University  
Deng, Xin, Shanghai University of Finance and Economics  
Deng, Yongheng, University of Wisconsin-Madison  
Denrell, Jerker, Oxford University  
Denter, Philipp , Universidad Carlos III de Madrid

Deo, Sarang, Indian School of Business  
Derakhshan, Mahsa, University of Maryland, College Park  
Derdenger, Timothy, Carnegie Mellon University  
Derrien, François, HEC Paris  
Dertwinkel-Kalt, Markus, Frankfurt School of Finance & Management  
Derwall, Jeroen, Maastricht University  
Deryugina, Tatyana, University of Illinois  
Desai, Sunita, New York University  
DeSantola, Alicia, University of Washington  
Desir, Antoine, Columbia University  
Despotakis, Stylianos, City University of Hong Kong  
Dessaint, Olivier, University of Toronto  
Detering, Nils, University of California, Santa Barbara  
Detzel, Andrew, University of Denver  
Devalkar, Sripad, Indian School of Business  
DeValve, Levi, University of Chicago  
Devers, Cynthia, Texas A&M University  
Dew, Ryan, University of Pennsylvania  
Dezsö, Cristian, University of Maryland, College Park  
Dhami, Mandeep, Middlesex University  
Di Giuli, Alberta, ESCP Europe  
Di Stefano, Giada, Bocconi University  
Diamond, William, University of Pennsylvania  
Dianat, Ahrash, University of Essex  
Dibbern, Jens, University of Bern  
Dick, Travis, University of Pennsylvania  
Dick-Nielsen, Jens, Copenhagen Business School  
Dicks, David, Baylor University  
Diecidue, Enrico, INSEAD  
Diederich, Johannes, Heidelberg University  
Dietvorst, Berkeley, University of Chicago  
Dikolli, Shane, University of Virginia  
Dimant, Eugen, University of Pennsylvania  
Dimitriadis, Stefan, University of Toronto  
Dimitrova, Lora, University of Exeter  
Dimmock, Stephen, Nanyang Technological University  
Ding, Peng, University of California, Berkeley  
Ding, Waverly, University of Maryland  
Ding, Yichuan, McGill University  
Dingel, Jonathan, University of Chicago  
DiPrete, Thomas, Columbia University  
Disney, Stephen, University of Exeter  
Dittmar, Robert, University of Michigan  
Dixon, Matthew, Illinois Institute of Technology  
Dizdar, Deniz, University of Montreal  
Dobrev, Dobrislav, Federal Reserve Board  
Doering, Laura, University of Toronto  
Dogan, Mustafa, Massachusetts Institute of Technology

Dokko, Jane, Federal Reserve Bank of Chicago  
Dominiak, Adam, Virginia Polytechnic Institute and State University  
Donaldson, Jason, Washington University  
Donelson, Dain, University of Texas  
Dong, Jing, Columbia University  
Dong, Xiaojing, Santa Clara University  
Dong, Yan, University of South Carolina  
Doosti, Shahryar, Chapman University  
Dorado, Silvia, University of Massachusetts Boston  
Doran, Kirk, University of Notre Dame  
Dordzhieva, Aysa, University of Texas at Austin  
Dorfleitner, Gregor, University of Regensburg  
Dorn, Daniel, Drexel University  
Dorobantu, Sinziana, New York University  
Doroudi, Sherwin, Carnegie Mellon University  
Dou, Winston, University of Pennsylvania  
Dou, Yifan, Fudan University  
Dou, Yiwei, New York University  
Douthit, Jeremy, University of Arizona  
Doval, Laura, California Institute of Technology  
Dover, Yaniv, Hebrew University of Jerusalem  
Draganska, Michaela, Drexel University  
Drake, David, University of Colorado Boulder  
Drake, Katharine, University of Arizona  
Drake, Michael, Brigham Young University  
Drakopoulos, Kimon, University of Southern California  
Dranove, David, Northwestern University  
Dreber, Anna, Stockholm School of Economics  
Drechsel, Thomas, University of Maryland, College Park  
Drouvelis, Michalis, University of Birmingham  
Drugov, Mikhail, University of Warwick  
Drymiotes, George, Texas Christian University  
Du, Fei, University of Illinois at Urbana-Champaign  
Du, Jinzhao, University of Hong Kong  
Du, Wenxin, University of Chicago  
Duan, Ying, Simon Fraser University  
Duchin, Ran, Boston College  
Ductor, Lorenzo, University of Granada  
Dufwenberg, Martin, University of Arizona  
Duguay, Raphael, Yale University  
Duke, Kristen, University of Toronto  
Dulleck, Uwe, Queen's University  
Dumas, Bernard, INSEAD  
Duong, Huu Nhan, Monash University  
Duong, Truong, Iowa State University  
Dur, Robert, Erasmus University  
Dutting, Paul, London School of Economics and Political Science  
Duxbury, Darren, Newcastle University

Dwenger, Nadja, University of Hohenheim  
Dyer, Travis, Cornell University  
Dzyabura, Daria, New Economic School  
Ebert, Sebastian, Frankfurt School of Finance & Management  
Eckles, Dean, Massachusetts Institute of Technology  
Ederer, Florian , Yale University  
Ederhof, Merle, Stanford University  
Edwards, David, Emory University  
Eftekhar, Mahyar, Arizona State University  
Egan, Mark, Harvard Business School  
Eggers, Felix, University of Groningen  
Ehling, Paul, BI Norwegian Business School  
Ehrgott, Matthias, Lancaster University  
Ehrmann, Michael, Bank of Canada  
Eichberger, Jurgen, Heidelberg University  
Eisenbach, Thomas, Federal Reserve Bank of New York  
Eisert, Tim, Erasmus University  
El Ghouli, Sadok, University of Alberta  
El Kihal, Siham, Frankfurt School of Finance & Management  
El-Amine, Hadi, George Mason University  
Elfenbein, Daniel, Washington University in St. Louis  
Elias, Julio, CEMA University  
Ellahie, Atif, University of Utah  
Ellingsen, Tore, Stockholm School of Economics  
Ellul, Andrew, Indiana University  
Elmachtoub, Adam, Columbia University  
Elsner, Benjamin, University College Dublin  
Emadi, Seyed M., University of North Carolina at Chapel Hill  
Embrechts, Paul, ETH Zürich  
Emerick, Kyle, Tufts University  
Emich, Kyle, University of Delaware  
Emmerling, Johannes, Fondazione Eni Enrico Mattei  
Engel, Christoph, Max Planck Institut for Research on Collective Goods  
Engel, Ellen, University of Illinois at Chicago  
Engelberg, Joseph, University of California, San Diego  
Engelmann, Jan, University of Amsterdam  
Englmaier, Florian, LMU Munich  
Epure, Mircea, Pompeu Fabra University  
Eraker, Bjorn, University of Wisconsin-Madison  
Erat, Sanjiv, University of California, San Diego  
Erev, Ido, Technion Israel Institute of Technology  
Erhun, Feryal, University of Cambridge  
Erkens, David, Georgetown University  
Ermolov, Andrey , Fordham University  
Erol, Atiye, University of Pennsylvania  
Erol, Selman, Carnegie Mellon University  
Ersahin, Nuri, Michigan State University  
Ershov, Daniel, Toulouse 1 University Capitole

Ertan, Aytekin, London Business School  
Ertekin, Necati, University of Minnesota  
Ertimur, Yonca, University of Colorado Boulder  
Escanciano, Juan Carlo, Universidad Carlos III de Madrid  
Esteves-Sorenson, Constanca, Yale University  
Evangelidis, Ioannis, Ramon Llull University  
Evers, Ellen, University of California, Berkeley  
Ewens, Michael, California Institute of Technology  
Exley, Christine, Harvard Business School  
Faccio, Mara, Purdue University  
Fadinger, Harald, University of Mannheim  
Fahlenbrach, Rudiger, École Polytechnique Federale de Lausanne  
Fahn, Matthias, Johannes Kepler University Linz  
Fairlie, Robert, University of California, Santa Cruz  
Falato, Antonio, Federal Reserve Board  
Faltings, Boi, Swiss Federal Institute of Technology Lausanne  
Fan, Mingxuan, National University of Singapore  
Fan, Qintao, University of Oregon  
Fan, Weiguo, University of Iowa  
Fang (HKU), Xiang, University of Hong Kong  
Fang, Vivian, University of Minnesota  
Fang, Xiao, University of Delaware  
Fang, Xiaohua, Florida Atlantic University  
Fang, Xin, Singapore Management University  
Faro, José Heleno, Federal University of Minas Gerais  
Farrell, Max, University of Chicago  
Farre-Mensa, Joan, University of Illinois at Chicago  
Farronato, Chiara, Harvard Business School  
Farukh, Razi, University of Cologne  
Faurel, Lucile, Arizona State University  
Fauver, Larry, University of Tennessee  
Favero, Carlo, Bocconi University  
Fay, Scott, Syracuse University  
Fazli, Amir, University of Washington  
Featherstone, Clayton, University of Pennsylvania  
Fehder, Daniel, University of Southern California  
Fehr, Dietmar, Heidelberg University  
Fehrler, Sebastian, University of Konstanz  
Feiler, Daniel, Dartmouth College  
Feinberg, Fred, University of Michigan  
Feinstein, Zachary, Stevens Institute of Technology  
Feldberg, Alexandra, Harvard Business School  
Feldman, David, University of New South Wales  
Feldman, Emilie, University of Pennsylvania  
Feldman, Jacob, Washington University  
Feldman, Pnina, Boston University  
Feltovich, Nick, Monash University  
Feng, Gavin, City University of Hong Kong

Feng, Josh, University of Utah  
Feng, Juan, City University of Hong Kong  
Feng, Mei, University of Pittsburgh  
Feng, Yifan, National University of Singapore  
Ferguson, John-Paul, McGill University  
Fernandes, Ana, University of Exeter  
Fernandez, Carlos, New York University  
Fernando, Duarte, Federal Reserve Bank New York  
Ferracuti, Elia, Duke University  
Ferreira, Kris, Harvard Business School  
Ferreira, Pedro, Carnegie Mellon University  
Feunou, Bruno , Bank of Canada  
Field, Laura, University of Delaware  
Files, Rebecca, University of Texas at Dallas  
Filipovic, Damir, Swiss Federal Institute of Technology Lausanne  
Filippas, Apostolos, Fordham University  
Filiz-Ozbay, Emel, University of Maryland, College Park  
Fink, Lior, Ben-Gurion University of the Negev  
Fischer, Mira, WZB Berlin Social Science Center  
Fisk, Susan, Kent State University  
Fitzgerald, Tristan , Texas A&M University  
Flammer, Caroline, Boston University  
Flannery, Mark, University of Florida  
Flicker, Blair, University of South Carolina  
Florysiak, David, University of Southern Denmark  
Floyd, Eric, University of California, San Diego  
Foley, Sean, University of Sydney  
Fong, Nathan, Rutgers University  
Fonseca, Julia, University of Illinois at Urbana-Champaign  
Fonseca, Miguel, University of Exeter  
Fons-Rosen, Christian, Pompeu Fabra University  
Forbes, Silke, Tufts University  
Fornwagner, Helena, University of Regensburg  
Foros, Øystein, Norwegian School of Economics  
Fortney, Steven, Yale University  
Forythe, Eliza, University of Illinois at Urbana-Champaign  
Fos, Vyacheslav, Boston College  
Fosfuri, Andrea, Bocconi University  
Fournier, Mathieu, École des Hautes Etudes Commerciales  
Foutz, Natasha, University of Virginia  
Fracassi, Cesare, University of Texas at Austin  
Fradkin, Andrey, Boston University  
Frake, Justin, University of Michigan  
Frakes, Michael, Duke University  
Frame, Scott, Federal Reserve Bank of Dallas  
Frank, Murray, University of Minnesota  
Franses, Philip Hans, Erasmus University  
Fransoo, Jan, Tilburg University

Franzen, Axel, University of Bern  
Frazelle, Andrew, University of Texas at Dallas  
Freddi, Eleonora , Telenor Research  
Frederick, Shane, Yale University  
Freeman, David, Simon Fraser University  
Freeman, Michael, INSEAD  
Frei, Christoph, University of Alberta  
Fresard, Laurent, University of Maryland  
Freund, Daniel, Massachusetts Institute of Technology  
Frick, Bernd, Paderborn University  
Friebel, Guido, Goethe University Frankfurt  
Friebel, Rocco , London School of Economics and Political Science  
Frimor, Hans, University of Southern Denmark  
Frug, Alexander, Pompeu Fabra University  
Frydman, Cary, University of Southern California  
Fu, Runshan, Carnegie Mellon University  
Fügener, Andreas , Universitat zu Koln  
Fugger, Nicolas, Leibniz Centre for European Economic Research  
Füllbrunn, Sascha, Radboud Universiteit  
Funk, Friederike, New York University Shanghai  
Funk, Russell, University of Minnesota  
Furlan, Andrea, University of Padua  
Furman, Jeff, Boston University  
Fusai, Gianluca, Cass Business School  
Fusari, Nicola, Johns Hopkins University  
Gaertig, Celia, University of Chicago  
Gaetani, Ruben, University of Toronto  
Gagliardi, Luisa, Bocconi University  
Gaither, Sarah, Duke University  
Gal, David, Northwestern University  
Galak, Jeff, Carnegie Mellon University  
Galanis, Spyros, City, University of London  
Galasso, Alberto, University of Toronto  
Galeotti, Fabio, University of Lyon  
Gallagher, Emily, University of Colorado Boulder  
Gallani, Susanna, Harvard Business School  
Gallimberti, Carlo, Boston College  
Gallino, Santiago, University of Pennsylvania  
Gallmeyer, Michael, McIntire School of Commerce  
Gallo, Lindsey, University of Michigan  
Gallus, Jana, University of California, Los Angeles  
Galperin, Roman, Johns Hopkins University  
Gamble, Keith, Middle Tennessee State University  
Gan, Jingxing (Rowena), Southern Methodist University  
Ganco, Martin, University of Wisconsin-Madison  
Ganduri, Rohan , Emory University  
Gangadharan, Lata, Monash University  
Ganguli, Ina, University of Massachusetts Amherst

Gangwar, Manish, Indian School of Business  
Ganju, Kartik, McGill University  
Ganser, Christian, LMU Munich  
Gantchev, Nickolay, University of Warwick  
Gantner, Anita, University of Innsbruck  
Gao, Cheng, University of Michigan  
Gao, Fei, Indiana University Bloomington  
Gao, Huasheng, Fudan University  
Gao, Janet, Indiana University  
Gao, Long, University of California, Riverside  
Gao, Pengjie, University of Notre Dame  
Gao, Rui, University of Texas at Austin  
Gao, Sarah Yini, Lee Kong Chian School of Business  
Gao, Xiangyu, Chinese University of Hong Kong  
Gao, Xiaodan, Renmin University of China  
Gao, Zhenyu, Chinese University of Hong Kong  
Garcia, Alfredo , Texas A&M University  
Garcia, Diego, University of North Carolina at Chapel Hill  
Garcia, Gian-Gabrial, Harvard Medical School  
Garcia, Sergio, University of the Balearic Islands  
Gardete, Pedro, Nova School of Business and Economics  
Gardner, Kristen, Amherst College  
Garg, Nikhil, Stanford University  
Garg, Rajiv, Emory University  
Gargano, Antonio, University of Melbourne  
Garimella, Aravinda, University of Illinois at Urbana-Champaign  
Garmaise, Mark, University of California, Los Angeles  
Garriott, Corey, Bank of Canada  
Gatchev, Vladimir, University of Central Florida  
Gatignon, Aline, University of Pennsylvania  
Gaudin, Germain, European Commission  
Ge, Li, Monash University  
Ge, Shan, New York University  
Ge, Weili, University of Washington  
Gee, Laura, Tufts University  
Geelen, Thomas, Copenhagen Business School  
Gehrig, Thomas, University of Vienna  
Gelber, Alexander, University of California, San Diego  
Gelper, Sarah, Eindhoven University of Technology  
Georgalos, Konstantinos, Lancaster University  
Georganas, Sotiris, City, University of London  
Georghiou, Angelos , McGill University  
Georgiadis, George, Boston University  
Gerardi, Kristopher, Federal Reserve Bank of Atlanta  
Gerhards, Leonie, Universität Hamburg: Fakultät für Wirtschafts- und Sozialwissenschaften  
Gerken, William, University of Kentucky  
Germain, Laurent, Toulouse Business School  
Gershon, Rachel, Washington University in St. Louis

Gete, Pedro, IE Business School  
Geva, Tomer, Tel Aviv University  
Ghasemkhani, Hossein, Purdue University  
Ghate, Archis, University of Washington  
Ghent, Andra, University of North Carolina at Chapel Hill  
Ghoddusi, Hamed, Stevens Institute of Technology  
Ghose, Aditya, University of Wollongong  
Ghoshal, Abhijeet, University of Illinois at Urbana-Champaign  
Ghossoub, Mario, University of Waterloo  
Gianinazzi, Virginia, Nova School of Business and Economics  
Giannetti, Mariassunta, Stockholm School of Economics  
Giarratana, Marco, IE Business School  
Gibbs, Anthony, University of Maryland, College Park  
Gierlinger, Johannes, Universidad Carlos III de Madrid  
Gil, Ricard, Johns Hopkins University  
Gilbukh, Sophia, Baruch College  
Gilje, Erik, University of Pennsylvania  
Gill, David, Purdue University  
Gillan, Stuart, University of North Texas  
Gillette, Jacquelyn, Massachusetts Institute of Technology  
Gine, Xavier, World Bank Group  
Ginglinger, Edith, Paris Dauphine University  
Gipper, Brandon, Stanford University  
Giroud, Xavier, Columbia Business School  
Gittell, Jody Hoffer, Brandeis University  
Gkatzelis, Vasilis, Drexel University  
Glaeser, Chloe, University of North Carolina at Chapel Hill  
Glaeser, Stephen, University of North Carolina at Chapel Hill  
Glasserman, Paul, Columbia University  
Glebkin, Sergei, INSEAD  
Glennon, Britta, University of Pennsylvania  
Glover, Dylan, INSEAD  
Goberna, Miguel, University of Alicante  
Godart, Frédéric, INSEAD  
Godinho de Matos, Miguel, Católica Lisbon School of Business & Economics  
Godlewski, Christophe, University of Strasbourg  
Godsell, David, University of Illinois at Urbana-Champaign  
Goel, Naman, ETH Zürich  
Goenka, Aditya, University of Birmingham  
Goerg, Sebastian, Technical University of Munich  
Goette, Lorenz, University of Bonn  
Goetz, Daniel, University of Toronto  
Gofman, Michael, University of Wisconsin-Madison  
Goh, Joel, National University of Singapore  
Gokpinar, Bilal, University College London  
Goldman, Eitan, Indiana University  
Goldman, Jim, University of Toronto  
Goldman, Nathan, North Carolina State University

Goldsmith-Pinkham, Paul, Yale University  
Goldstein, Daniel, Microsoft Research  
Goldstein, Robert, University of Minnesota  
Golez, Benjamin , University of Notre Dame  
Goli, Ali, University of Chicago  
Golman, Russell, Carnegie Mellon University  
Golrezaei, Negin, Massachusetts Institute of Technology  
Goltsman, Maria, University of Waterloo  
Golubov, Andrey, University of Toronto  
Gomes, Francisco, London Business School  
Gomes, Renato, Toulouse 1 University Capitole  
Goncalves, Andrei, University of North Carolina at Chapel Hill  
Goncalves-Pinto, Luis, University of New South Wales  
Gondhi, Naveen, INSEAD  
Gong, Jing, Lehigh University  
Gong, Xiting, Chinese University of Hong Kong  
Gonzalez-Uribe, Juanita, London School of Economics and Political Science  
Goodman, Theodore, Purdue University  
Gopalakrishnan, Arun, Rice University  
Gopalakrishnan, Sanjith, University of British Columbia  
Gopalan, Yadav, Indiana University  
Gorback, Caitlin, University of Pennsylvania  
Gorbenko, Alexander , University of Southern California  
Gordon, Brett, Northwestern University  
Gordon, Elizabeth, Temple University  
Gormley, Todd, Washington University in St. Louis  
Gormsen, Niels, University of Chicago  
Gornall, Will, University of British Columbia  
Gosavi, Abhijit, Missouri University of Science and Technology  
Goswami, Indranil, University at Buffalo-The State University of New York  
Govindarajan, Aravind, No Affiliation  
Goyal, Manu, University of Utah  
Goyal, Vidhan, Hong Kong University of Science and Technology  
Goyal, Vineet, Columbia University  
Goyenko, Ruslan, McGill University  
Grabner, Isabella, Vienna University of Economics and Business  
Graffin, Scott, University of Georgia  
Granados, Nelson, Pepperdine University  
Grandy, Jake, University of Arkansas  
Granja, Joao, University of Chicago  
Grant, Stephanie, University of Washington  
Green, Clifton, Emory University  
Green, Daniel, Harvard University  
Green, Ellen, Arizona State University  
Green, Etan, University of Pennsylvania  
Greenberg, Jason, University of Pennsylvania  
Greene, Daniel, Clemson University  
Greenland, Andrew , Elon University

Greenwood, Brad, George Mason University  
Gregoire, Vincent, HEC Montréal  
Greiner, Ben, Vienna University of Economics and Business  
Grennan, Jillian, Duke University  
Grennan, Matthew, University of Pennsylvania  
Gretschko, Vitali, University of Mannheim  
Grewal, Jody, University of Toronto  
Grieder, Manuel, ETH Zürich  
Griffin, John, University of Texas at Austin  
Grigas, Paul, University of California, Berkeley  
Grimm, Michael, University of Passau  
Grinstein, Yaniv, IDC Herzliya  
Groen-Xu, Moqi, Queen Mary University of London  
Gromb, Denis, HEC Paris  
Gross, Daniel, Duke University  
Grosskopf, Brit, University of Exeter  
Grullon, Gustavo, Rice University  
Gryglewicz, Sebastian, Erasmus University  
Gu, Chris Naiqing, Georgia Institute of Technology  
Gu, Grace, Harvard University  
Gu, Ming, Xiamen University  
Gu, Olivia Lifeng, University of Hong Kong  
Gu, Shihao, University of Chicago  
Gu, Xian, Indiana University Bloomington  
Gu, Zheyin (Jane), University of Connecticut  
Guadalupi, Carla, Pontifical Catholic University of Chile  
Guajardo, Jose, University of California, Berkeley  
Gualandris, Jury, Western University  
Guan, Xu, Huazhong University of Science and Technology  
Guastaroba, Gianfranco, University of Brescia  
Gubler, Timothy, Brigham Young University  
Guda, Harish, Arizona State University  
Guedhami, Omrane, University of South Carolina  
Guembel, Alexander, Toulouse School of Economics  
Guenster, Nadja, University of Münster  
Guenzel, Marius, University of Pennsylvania  
Guest, Nick, Cornell University  
Gui, Luyi, University of California, Irvine  
Gulen, Huseyin, Purdue University  
Guler, Isin, University of North Carolina at Chapel Hill  
Gumus, Mehmet, McGill University  
Gunia, Brian, Johns Hopkins University  
Gunny, Katherine, University of Colorado Boulder  
Guo, Hui, University of Cincinnati  
Guo, Julian, Michigan State University  
Guo, Pengfei, City University of Hong Kong  
Guo, Tong, Duke University  
Guo, Xiaojia, University College London

Guo, Zhiling, Singapore Management University  
Gupta, Abhinav, University of Washington  
Gupta, Arpit, New York University  
Gupta, Atul, University of Pennsylvania  
Gupta, Deeksha, Carnegie Mellon University  
Gupta, Diwakar, University of Texas at Austin  
Gupta, Rahul, Duke University  
Gupta, Sudip, Fordham University  
Gupta, Swati, Georgia Institute of Technology  
Gupta, Varun , University of Chicago  
Gupta, Vishal, University of Southern California  
Gupte, Akshay, University of Edinburgh  
Gur, Yonatan, Stanford University  
Gurkan, Huseyin, ESMT Berlin  
Gurun, Umit, University of Texas at Dallas  
Gustafson, Matthew, Pennsylvania State University  
Guthrie, Graeme, Victoria University of Wellington  
Guzman, Jorge, Columbia University  
Haberman, Alexander, Harvard University  
Hacardiaux, Thomas, Université catholique de Louvain  
Hackbarth, Dirk, Boston University  
Hackney, John, University of South Carolina  
Haddad, Valentin, University of California, Los Angeles  
Haeckl, Simone, Vienna University of Economics and Business  
Haegele, Ingrid, University of California, Berkeley  
Hagenbach, Jeanne, Sciences Po  
Hagendorff, Jens, University of Edinburgh  
Haggag, Kareem, Carnegie Mellon University  
Hagiu, Andrei, Boston University  
Hahl, Oliver, Carnegie Mellon University  
Hajdu, Gergely, Vienna University of Economics and Business  
Halbheer, Daniel, HEC Paris  
Halgin, Dan, University of Kentucky  
Haliassos, Michael, Goethe University Frankfurt  
Hall, Randolph, University of Southern California  
Halling, Michael, Stockholm School of Economics  
Halonen-Akatwijuka, Maija, University of Bristol  
Ham, Charles, Washington University in St. Louis  
Ham, Sung, Michigan State University  
Hameed, Allaudeen, National University of Singapore  
Hamilton, Michael, Columbia University  
Hamilton, Ryan, Emory University  
Hammond, Robert, University of Alabama  
Han, Brandon, London School of Economics and Political Science  
Han, Chulwoo, Durham University  
Han, Jungsuk, Stockholm School of Economics  
Han, Sang Pil, Arizona State University  
Han, Yufeng, University of North Carolina at Charlotte

Hanaki, Nobuyuki, Osaka University  
Hand, John, University of North Carolina at Chapel Hill  
Hanguir, Oussama, Columbia University  
Hanley, Kathleen, Lehigh University  
Hann, Rebecca , University of Maryland  
Hannah, Douglas, Boston University  
Hansen, Stephen, Imperial College London  
Hansen, Wendy, University of New Mexico  
Hansman, Christopher, Imperial College London  
Hanspal, Tobin, Vienna University of Economics and Business  
Hao, Lin, Fordham University  
Harbring, Christine, Aachen University  
Hardin, Ashley, Washington University in St Louis  
Hardisty, David, University of British Columbia  
Harless, Patrick, University of Arizona  
Harmon, Derek, University of Michigan  
Harmon, Nikolaj, University of Copenhagen  
Harris, Cling, University of Wisconsin-Madison  
Harrison, Glenn, Georgia State University  
Harsha, Pavithra, IBM Thomas J Watson Research Center  
Hartman-Glaser, Barney, University of California, Los Angeles  
Hartzmark, Samuel, University of Southern California  
Harutyunyan, Mushegh, Imperial College London  
Hasan, Sharique, Duke University  
Hashim, Matthew, Eller College of Management  
Haskell, William, National University of Singapore  
Hasler, Michael, University of Toronto  
Hassin, Refael, Tel Aviv University  
Hatfield, John, University of Texas at Austin  
Haugh, Martin, Imperial College London  
Hauser, John R., Massachusetts Institute of Technology  
Hauser, Oliver, University of Exeter  
Haushalter, David, Pennsylvania State University  
Hausken, Kjell, University of Stavanger  
Hausman, Naomi, National Bureau of Economic Research  
Haviv, Avery, University of Toronto  
Hawk, Ashton, Ohio State University  
Hawn, Olga, University of North Carolina at Chapel Hill  
Haws, Kelly, Vanderbilt University  
He, Cheng, Georgia Institute of Technology  
He, Chuan, University of Colorado Boulder  
He, Fang, Tsinghua University  
He, Jie, University of Georgia  
He, Long, National University of Singapore  
He, Shu, University of Connecticut  
He, Simai, City University of Hong Kong  
He, Xuedong, Chinese University of Hong Kong  
He, Zhiguo, University of Chicago

Heath, Davidson, University of Utah  
Hebert, Camille, University of Toronto  
Heese, H. Sebastian, North Carolina State University  
Heese, Jonas, Harvard Business School  
Hefti, Andreas, University of Zurich  
Hegde, Deepak, New York University  
Heider, Florian, European Central Bank  
Heidhues, Paul, Heinrich-Heine-Universität Düsseldorf  
Heimer, Rawley , Boston College  
Heinle, Mirko, University of Pennsylvania  
Heinz, Matthias, Goethe University Frankfurt  
Heitz, Amanda, Tulane University  
Heitzman, Shane, University of Southern California  
Hekimoglu, Mert Hakan, Rensselaer Polytechnic Institute  
Heller, Yuval, Bar-Ilan University  
Hellmann, Thomas, University of Oxford  
Helm, Jonathan, Indiana University Bloomington  
Henderson, Andrew, University of Texas at Austin  
Henderson, Brian, George Washington University  
Hendricks, Bradley, University of North Carolina at Chapel Hill  
Henkel, Joachim, Technische Universität München  
Henry, Elaine, Stevens Institute of Technology  
Henry, Emeric, Sciences Po  
Henry, Tyler, Miami University  
Herings, P., Maastricht University  
Hermalin, Benjamin, University of California, Berkeley  
Hermle, Johannes, University of California, Berkeley  
Hermosilla, Manuel, Johns Hopkins University  
Hernández-Orallo, José, Polytechnic University of Valencia  
Hersh, Jonathan, Chapman University  
Hershfield, Hal, University of California, Los Angeles  
Herskovic, Bernard, University of California, Los Angeles  
Hertzfel, Michael, Arizona State University  
Hervas-Drane, Andres, University College London  
Herweg, Fabian, University of Munich  
Herz, Holger, University of Fribourg  
Herzog, Stefan, Max Planck Institute for Human Development  
Hett, Florian, Johannes Gutenberg University  
Hicks, Illya, Rice University  
Hidaji, Hooman, University of Calgary  
Hiemann, Moritz, Columbia University  
Hillenbrand, Adrian, Max Planck Institute for Research on Collective Goods  
Hinnosaar, Marit, Collegio Carlo Alberto  
Hinson, Lisa, University of Florida  
Hinzen, Franz, New York University  
Hirschey, Nicholas, London Business School  
Hirshman, Samuel, University of Colorado Boulder  
Hirtle, Beverly, Federal Reserve Bank New York

Hitzemann, Steffen, Rutgers University  
Hjalmarsson, Erik, University of Gothenburg  
Hjort, Jonas, Columbia University  
Ho, Chad, George Washington University  
Ho, Chin Pang, City University of Hong Kong  
Hoban, Paul, University of Wisconsin-Madison  
Hoberg, Gerard, University of Southern California  
Hochberg, Yael, Rice University  
Hodges, Sara, University of Oregon  
Hoekstra, Mark, Texas A&M University  
Hoffman, Mitchell, University of Toronto  
Hoffmann Pham, Katherine, New York University  
Hoffmann, Peter, European Central Bank  
Hofman, Jake, Microsoft Research  
Hofmann, Christian, LMU Munich  
Hoisl, Karin, University of Mannheim  
Hollenbeck, Brett, University of California, Los Angeles  
Holm, Hakan, Lund University  
Holmgren, A Jay, Harvard University  
Holtz, David, Massachusetts Institute of Technology  
Holzman, Eric, Ohio State University  
Hombert, Johan, HEC Paris  
Hong, Bryan, University of Missouri-Kansas City  
Hong, Claire, Shanghai Advanced Institute of Finance  
Hong, Fuhai, Nanyang Technological University  
Hong, Hyun, University of California, Riverside  
Honhon, Dorothee, University of Texas at Dallas  
Honka, Elisabeth, University of California, Los Angeles  
Hoopes, Jeffrey, University of North Carolina at Chapel Hill  
Hope, Ole-Kristian, University of Toronto  
Horton, John, Massachusetts Institute of Technology  
Hossain, Tanjim, University of Toronto  
Hotchkiss, Edie, Boston College  
Hotchkiss, Edith, Boston College  
Hotkar, Parshuram, Indian School of Business  
Houde, Sebastien, ETH Zürich  
Howard, Philip, Wake Forest University  
Howe, Piers, University of Melbourne  
Hoy, Michael, University of Guelph  
Hristakeva, Sylvia, University of California, Los Angeles  
Hsu, Alex, Georgia Institute of Technology  
Hsu, Charles, Hong Kong University of Science and Technology  
Hsu, Joanne, Federal Reserve Board  
Hsu, Ming, University of California, Berkeley  
Hu, Allen, Yale University  
Hu, Bin, University of Texas at Dallas  
Hu, Danqi, Northwestern University  
Hu, Jianfeng, Singapore Management University

Hu, Kejia, Vanderbilt University  
Hu, Maggie, Chinese University of Hong Kong  
Hu, Mantian, Chinese University of Hong Kong  
Hu, Ming, University of Toronto  
Hu, Qiaohai (Joice), University of Missouri-St. Louis  
Hu, Ruimeng, University of California, Santa Barbara  
Hu, Xing, PBC School of Finance  
Hu, Yuheng, University of Illinois at Chicago  
Hu, Zhenyu, National University of Singapore  
Hua, Xinyu, Hong Kong University of Science and Technology  
Huang, Longbo, Tsinghua University  
Huang, Alan, University of Waterloo  
Huang, Allen, Hong Kong University of Science and Technology  
Huang, Chong, University of California, Irvine  
Huang, Dashan, Singapore Management University  
Huang, Guofang, Purdue University  
Huang, Jiekun, University of Illinois at Urbana-Champaign  
Huang, Jin, New York University Shanghai  
Huang, Jing-zhi, Pennsylvania State University  
Huang, Kershen, Nova Southeastern University  
Huang, Laura, Harvard Business School  
Huang, Ni, University of Houston  
Huang, Peng, University of Maryland  
Huang, Qianqian, City University of Hong Kong  
Huang, Rachel, National Central University  
Huang, Rong, Fudan University  
Huang, Ruidi, Southern Methodist University  
Huang, Shan, University of Washington  
Huang, Shiyang, HKU Business School  
Huang, Tingliang, Boston College  
Huang, Wenqian, Vrije Universiteit  
Huang, Xiao, Concordia University  
Huang, Ximin, University of Minnesota  
Huang, Xing, Washington University in St. Louis  
Huang, Yan, Carnegie Mellon University  
Huang, Yangguang, Hong Kong University of Science and Technology  
Huang, Yi, Graduate Institute, Geneva  
Huang, Yufeng, University of Rochester  
Huang, Zhaojun, Tsinghua University  
Huang, Zhongwei, Cass Business School  
Huber, Joel, Duke University  
Huber, Juergen, University of Innsbruck  
Hugon, Artur, Arizona State University  
Huh, Sahn-Wook, State University of New York at Buffalo  
Huh, Woonghee, University of British Columbia  
Hui, Kai Wai, University of Hong Kong  
Hui, Xiang, Washington University in St. Louis  
Humphrey, Jacquelyn, University of Queensland

Hung, Mingyi, Hong Kong University of Science and Technology  
Hunold, Matthias, Düsseldorf Institute for Competition Economics  
Hutchison-Krupat, Jeremy, University of Cambridge  
Hutton, David, University of Michigan  
Hwang, Byoung-Hyoun, Cornell University  
Hwang, Chuan Yang, Nanyang Technological University  
Hwang, Elina, University of Washington  
Hwang, Woonam, University of Utah  
Hyndman, Kyle, University of Texas at Dallas  
Iacovone, Leonardo, World Bank Group  
Iancu, Dan, Stanford University  
Ibanez, Maria, Harvard Business School  
Ibrahim, Rouba, University College London  
Ichihashi, Shota, Bank of Canada  
Igami, Mitsuru, Yale University  
Igan, Deniz, International Monetary Fund  
Iliev, Peter, Pennsylvania State University  
Ilkilic, Rahmi, University of Chile  
Imai, Susumu, Hokkaido University  
Imas, Alex, University of Chicago  
Inderst, Roman, Goethe University Frankfurt  
Ingolfsson, Armann, University of Alberta  
Ioannidou, Vasso, Lancaster University  
Irani, Rustom, University of Illinois  
Iravani, Foad, University of Washington  
Iriberry, Nagore, University of the Basque Country  
Irvine, Paul, Texas Christian University  
Iselin, Michael, University of Minnesota, Twin Cities  
Ishihara, Masakazu, New York University  
Israeli, Ayelet, Harvard Business School  
Israelsen, Ryan, Michigan State University  
Iverson, Benjamin, Brigham Young University  
Ivković, Zoran, Michigan State University  
Iyengar, Raghuram, University of Pennsylvania  
Iyer, Krishnamurthy, University of Minnesota, Twin Cities  
Izhakian, Yehuda, New York University  
Jabr, Wael, Pennsylvania State University  
Jacob, Martin, WHU - Otto Beisheim School of Management  
Jacobs, Brian, Pepperdine University  
Jacobs, Kris, McGill University  
Jacquillat, Alexandre, Massachusetts Institute of Technology  
Jagabathula, Srikanth, New York University  
Jagadeesan, Meena, Harvard University  
Jagadeesan, Ravi, Harvard Business School  
Jagannathan, Ravi, Northwestern University  
Jagolinzer, Alan, University of Cambridge  
Jaimungal, Sebastian, University of Toronto  
Jain, Aditya, Baruch College

Jain, Nitish, London Business School  
Jain, Tarun, Indian School of Business  
Jakiela, Pamela, Williams College  
Jame, Russell, University of Kentucky  
Janakiraman, Ganesh, University of Texas at Dallas  
Jang, YeeJin, University of New South Wales  
Jansen, Mark, University of Utah  
Janssen, Maarten, University of Vienna  
Jarva, Henry, Aalto University  
Jasin, Stefanus, University of Michigan  
Javadekar, Apoorva, Indian School of Business  
Jayaraman, Sudarshan, University of Rochester  
Jeffers, Jessica, University of Chicago  
Jena, Deepak, University of North Carolina at Chapel Hill  
Jenkins, Jeff, Brigham Young University  
Jennings, Jared, Washington University in St. Louis  
Jens, Candace, Tulane University  
Jensen, Christian, Bocconi University  
Jensen, Matthew, University of Oklahoma  
Jensen, Michael, University of Michigan  
Jerath, Kinshuk, Columbia Business School  
Ji, Shaoxiong, Aalto University  
Jia, Chunxin, Peking University  
Jia, Justin, University of Tennessee  
Jia, Nan, University of Southern California  
Jia, Ning, Tsinghua University  
Jia, Yanwei, National University of Singapore  
Jia, Yuping, Frankfurt School of Finance & Management  
Jiang, Baojun, Washington University in St. Louis  
Jiang, Daniel, University of Pittsburgh  
Jiang, Danling, Florida State University  
Jiang, Feng, State University of New York at Buffalo  
Jiang, Fuwei, Central University of Finance and Economics  
Jiang, Hao, Michigan State University  
Jiang, John, Michigan State University  
Jiang, Li, George Washington University  
Jiang, Li, Hong Kong Polytechnic University  
Jiang, Ruiwei, University of Michigan  
Jiang, Wei, Hong Kong University of Science and Technology  
Jiang, Wenxi, Chinese University of Hong Kong  
Jiang, Winnie, INSEAD Asia Campus  
Jiang, Zhaohui (Zoey), Carnegie Mellon University  
Jiang, Zhengrui, Nanjing University  
Jiang, Zhenhui (Jack), University of Hong Kong  
Jiang, Zhenling, University of Pennsylvania  
Jiao, Peiran, Maastricht University  
Jin, Chen, National University of Singapore  
Jin, Fujie, Indiana University Bloomington

Jin, Lawrence, California Institute of Technology  
Jindal, Pranav, University of North Carolina  
Jing, Wu, Tsinghua University  
Jing, Bing, Cheung Kong Graduate School of Business  
Jochem, Torsten, University of Amsterdam  
Johannesen, Niels , University of Copenhagen  
Johar, Monica, University of North Carolina at Charlotte  
John, Leslie, Harvard Business School  
Johnen, Johannes, Université catholique de Louvain  
Johnson, Bret, George Mason University  
Johnson, Eric, Columbia University  
Johnson, Garrett, Boston University  
Johnson, Travis, University of Texas at Austin  
Jonasson, Jonas, Massachusetts Institute of Technology  
Jondeau, Eric, University of Lausanne  
Jonker, Nicole, De Nederlandsche Bank  
Joo, Mingyu, University of California, Riverside  
Jorion, Philippe, University of California, Irvine  
Joshi, Gauri, Carnegie Mellon University  
Joshi, Yogesh, University of Maryland  
Joslin, Scott, University of Southern California  
Jotikasthira, Chotibhak, Southern Methodist University  
Jotikasthira, Pab, Southern Methodist University  
Jouini, Oualid, École Centrale Paris  
Juárez, Rubén, University of Hawaii  
Julio, Brandon, University of Oregon  
Jung, JaeHwuen, Temple University  
Jung, Michael, University of Delaware  
Jung, Wooseok, HEC Paris  
Kaaua, Dawson, Georgetown University  
Kabra, Ashish, University of Maryland, College Park  
Kachelmeier, Steve, University of Texas at Austin  
Kacperczyk, Olenka, London Business School  
Kadam, Sangram, Charles River Associates  
Kadiyala, Bharadwaj, University of Utah  
Kagan, Evgeny, Johns Hopkins University  
Kahraman, Bige, University of Oxford  
Kalanoski, Dimitrija, University of Lausanne  
Kalay, Alon, Columbia University  
Kalda, Ankit , Indiana University Bloomington  
Kalkanci, Basak, Georgia Institute of Technology  
Kallus, Nathan, Cornell Tech  
Kalnins, Arturs, Cornell University  
Kama, Itay, University of Michigan  
Kamada, Yuichiro, University of California, Berkeley  
Kamble, Vijay, University of Illinois at Chicago  
Kang, Hyo, University of Southern California  
Kang, Jun-Koo, Nanyang Technological University

Kang, Wanmo, Korea Advanced Institute of Science and Technology  
Kannan, Aadharsh, Microsoft  
Kannan, Karthik, Southern Methodist University  
Kannan, P., University of Maryland  
Kanoria, Yash, Columbia University  
Kanz, Martin, World Bank Group  
Kao, Jennifer, University of California, Los Angeles  
Kao, Yuan-Mao, Duke University  
Kapadia, Nishad, Tulane University  
Kaplan, Edward, Yale University  
Kaplan, Todd, Exeter University  
Kaplan, Zachary, Washington University in St. Louis  
Kapor, Adam, Princeton University  
Kar, Wreeto, Purdue University  
Karacaoglu, Nil, Northwestern University  
Karagozoglu, Emin, Bilkent University  
Karakas, Oguzhan, University of Cambridge  
Karas, Alexei, University College Roosevelt  
Karellaia, Natalia, INSEAD  
Karle, Heiko, Frankfurt School of Finance & Management  
Karmarkar, Uma, Harvard Business School  
Karmegam, Sabari, University of Maryland, College Park  
Karnaukh, Nina, Ohio State University  
Karolyi, Stephen, Carnegie Mellon University  
Karplus, Valerie, Massachusetts Institute of Technology  
Kasy, Max, Harvard University  
Katsamakos, Evangelos, Fordham University  
Kattuman, Paul, University of Cambridge  
Kaul, Aseem, University of Minnesota  
Kaur, Supreet, University of California, Berkeley  
Kausar, Asad, American University  
Ke, T. Tony, Chinese University of Hong Kong  
Kecskes, Ambrus, York University  
Keenan, Elizabeth, Harvard Business School  
Keller, JR, Cornell University  
Kelley, Eric, University of Arizona  
Kellner, Christian, University of Southampton  
Kelly, Peter, University of Notre Dame  
Kemel, Emmanuel, HEC Paris  
Kempf, Alexander, University of Cologne  
Kempf, Elisabeth, University of Chicago  
Kepler, John, University of Pennsylvania  
Keppler, Samantha, University of Michigan  
Keppo, Jussi, National University of Singapore  
Kerr, William, Harvard University  
Kesavan, Saravanan, University of North Carolina at Chapel Hill  
Keskin, N. Bora, Duke University  
Kesselheim, Thomas, University of Bonn

Kesten, Onur , Carnegie Mellon University  
Keum, Daniel, Columbia University  
Keys, Benjamin, University of Pennsylvania  
Khademi, Amin, Clemson University  
Khalmet ski, Kiryl, University of Cologne  
Khan, Urooj, Columbia Business School  
Khanna, Gaurav, University of California, San Diego  
Khashabi, Pooyan, Ludwig-Maximilians-University Munich  
Khern-am-nuai, Warut, Purdue University  
Khosravi, Khashayar, Stanford University  
Kielty, Patrick, Ohio State University  
Kieren, Pascal, University of Mannheim  
Kilduff, Gavin, New York University  
Kilic, Mete, University of Southern California  
Kim, Antino, Indiana University Bloomington  
Kim, Dayoung, California State University, Fullerton  
Kim, Dong Soo, Ohio State University  
Kim, Eunhee, City University of Hong Kong  
Kim, Eun-Hee , Fordham University  
Kim, Hae-Ryong, Konkuk University  
Kim, Heedong, Baruch College  
Kim, Hwa Young, University of California, Los Angeles  
Kim, Hyunjin, Harvard Business School  
Kim, Hyunseob, Cornell University  
Kim, J. Daniel, University of Pennsylvania  
Kim, Jaehwan, Korea University  
Kim, Jaewoo, University of Oregon  
Kim, Jeunghyun, Korea University  
Kim, Jinhwan, Stanford University  
Kim, Jun Beom, Seoul National University  
Kim, Keongtae, Chinese University of Hong Kong  
Kim, Kihoon, Korea University  
Kim, Kyoo Il, Michigan State University  
Kim, Michael, University of British Columbia  
Kim, Minjae, Rice University  
Kim, Sehwa, Columbia University  
Kim, Song-Hee, University of Southern California  
Kim, Soohun, Korea Advanced Institute of Science and Technology  
Kim, Suntae, Boston College  
Kim, Taejin, Korea University  
Kim, Tami, University of Virginia  
Kim, Tongil "TI", University of Texas at Dallas  
Kim, Y. Han (Andy), Sungkyunkwan University  
Kim, Yongtae, Santa Clara University  
Kim, Youngsoo, Texas Tech University  
Kim, Youngsoo, University of Alabama  
Kimbrough, Erik, Chapman University  
Kimbrough, Michael, University of Maryland, College Park

Kimes, Sheryl, Cornell University  
King, Andrew, Boston University  
Kini, Omesh, Georgia State University  
Kirby, Chris, University of North Carolina at Charlotte  
Kirchkamp, Oliver, University of Jena  
Kirchler, Michael, University of Innsbruck  
Kirk, Marcus, University of Florida  
Kirschenmann, Karolin, Leibnitz Centre for European Economic Research  
Kirshner, Samuel, University of New South Wales  
Kitapbayev, Yerkin, North Carolina State University  
Klapper, Helge, Erasmus University  
Klapper, Leora, World Bank Group  
Klasa, Sandy, University of Arizona  
Klassen, Robert, University of Waterloo  
Klein, April, New York University  
Klein, Jill, University of Melbourne  
Klein, Thilo, Pforzheim University of Applied Sciences  
Kleinbaum, Adam M., Dartmouth College  
Kleiner, Kristoph, Indiana University  
Klemperer, Paul, Oxford University  
Kleymenova, Anya, Board of Governors of the Federal Reserve System  
Klingler, Sven, BI Norwegian Business School  
Kluender, Ray, Harvard Business School  
Knill, April, Florida State University  
Knott, Anne Marie, Washington University in St. Louis  
Knutfer, Samuli, BI Norwegian Business School  
Knyazeva, Diana, U.S. Securities and Exchange Commission  
Kocak, Ozgecan, Emory University  
Koch, Alexander, Aarhus University  
Koch, Christian, University of Vienna  
Kocher, Martin, University of Vienna  
Koenig, Philipp, German Federal Bank  
Koepl, Thorsten, Queen's University  
Koester, Allison, Georgetown University  
Kogut, Bruce, Columbia University  
Kojima, Fuhito, Stanford University  
Kokholm, Thomas, Aarhus University  
Kokkodis, Marios, Boston College  
Kolev, Julian, Southern Methodist University  
Kolev, Kalin, Baruch College  
Kolokolova, Olga, University of Manchester  
Komarova, Tatiana, London School of Economics and Political Science  
Konchitchki, Yaniv, University of California, Berkeley  
Kong, Guangwen, University of Minnesota  
Kong, Lei, University of Alabama  
König-Kersting, Christian, University of Innsbruck  
Koning, Rem, Harvard Business School  
Koning, Rembrand, Harvard Business School

Konstan, Joseph, University of Minnesota  
Koo, David, University of Illinois at Urbana-Champaign  
Koppman, Sharon, University of California, Irvine  
Kops, Christopher, Maastricht University  
Kornish, Laura, University of Colorado Boulder  
Korpeoglu, C. Gizem, Bilkent University  
Körpeoğlu, Ersin, University College London  
Korsaye, Sofonias, University of Geneva  
Kosar, Gizem, Federal Reserve Bank New York  
Koskinen, Yrjo, Haskayne School of Business University of Calgary  
Kosowski, Robert, Imperial College London  
Kostami, Vasiliki, HEC Paris  
Kostovetsky, Leonard, Boston College  
Kozegi, Botond, Central European University  
Kotowski, Maciej, University of California, Berkeley  
Kotter, Jason, Brigham Young University  
Kou, Steven, Boston University  
Koulayev, Sergei, Consumer Financial Protection Bureau  
Kourtis, Apostolos, University of East Anglia  
Koutney, Colin, George Mason University  
Kouwenberg, Roy, Mahidol University  
Kovacs, Balazs, Yale University  
Kozak, Serhiy, University of Maryland, College Park  
Kozhan, Roman, University of Warwick  
Kraft, Pepa, HEC Paris  
Kraft, Tim, North Carolina State University  
Krainer, John, Federal Reserve Board  
Kramer, Lisa, University of Toronto  
Kraus, Michael, Yale University  
Krawczyk, Michal, University of Warsaw  
Kreisman, Daniel, Georgia State University  
Kremens, Lukas, University of Washington  
Kremer, Mirko, Frankfurt School of Finance & Management  
Krepely Pool, Veronika, Vanderbilt University  
Kretschmer, Tobias, LMU Munich  
Krieger, Joshua, Harvard Business School  
Krishnan, Harish, University of British Columbia  
Krishnan, Karthik, Northeastern University  
Krishnaswamy, Anilseh, Stanford University  
Kristal, Tali, University of Haifa  
Kroer, Christian, Columbia University  
Kronlund, Mathias, Tulane University  
Kroos, Peter, University of Amsterdam  
Krueger, Philipp, University of Geneva  
Kruger, Samuel, University of Texas at Austin  
Krumer, Alex, Universitat Sankt Gallen  
Kryscynski, David, Brigham Young University  
Kuang, Jason, Georgia Institute of Technology

Kube, Sebastian, University of Bonn  
Kübler, Dorothea, WZB Berlin Social Science Center  
Kuchler, Theresa, New York University  
Kuehn, Lars-Alexander, Carnegie Mellon University  
Kuhn, Jeffrey, University of North Carolina at Chapel Hill  
Kulchania, Manoj, Wayne State University  
Kulchina, Elena, North Carolina State University  
Kulkarni, Nirupama, CAFRAL  
Kumar, Akhil, Pennsylvania State University  
Kumar, Amit, University of Texas at Austin  
Kumar, Anuj, University of Florida  
Kumar, Nanda, University of Texas at Dallas  
Kumar, Nitin, Indian School of Business  
Kumar, Vineet, Yale University  
Kummer, Michael, Georgia Institute of Technology  
Kundu, Amrita, London Business School  
Kung, Howard, London Business School  
Kunnumkal, Sumit, Indian School of Business  
Kuong, John, INSEAD  
Kuruzovich, Jason, Rensselaer Polytechnic Institute  
Kushwaha, Tarun, University of North Carolina  
Kwan, Alan, University of Hong Kong  
Kwasnica, Anthony, Pennsylvania State University  
Kwon, H. Dharma, University of Illinois at Urbana-Champaign  
Kyle, Margaret, MINES ParisTech  
Labianca, Giuseppe (Joe), University of Kentucky  
Lacetera, Nicola , University of Toronto  
Ladika, Tomislav, University of Amsterdam  
Lafortune, Jeanne, Pontifical Catholic University of Chile  
Lagaras, Spyridon, University of Pittsburgh  
Laguna, Marie-Aude, Paris Dauphine University  
Lahiri, Atanu, University of Texas at Dallas  
Lai, Ernest, Lehigh University  
Lai, Guoming, University of Texas at Austin  
Lai, Rose Neng, University of Macau  
Lam, Henry, Columbia University  
Lambert, Thomas, Erasmus University  
Lambertini, Luca, University of Bologna  
Lambie-Hanson, Lauren, Federal Reserve Bank of Philadelphia  
Lambrecht, Anja, London Business School  
Lambsdorff, Johann, University of Passau  
Lamy, Laurant, École Nationale des Ponts ParisTech  
Lanahan, Lauren, University of Oregon  
Landis, Blaine, University College London  
Landry, Peter, University of Toronto  
Landsman, Rachel, Bucknell University  
Lange, Andreas, University of Hamburg  
Langfield, Sam, European Systemic Risk Board

Langlois, Hugues, HEC Paris  
Lanzani, Giacomo, Massachusetts Institute of Technology  
Larkin, Yelena, York University  
Larocque, Stephannie, University of Notre Dame  
Larrain, Borja, Pontifical Catholic University of Chile  
Larsen, Brad, Stanford University  
Larson, Chad, Olin Business School  
Larsson, Martin, Carnegie Mellon University  
Lassance, Nathan, Université catholique de Louvain  
Laudenbach, Christine, Goethe University Frankfurt  
Lauga, Dominique, University of Cambridge  
Lauinger, Dirk, École Polytechnique Federale de Lausanne  
Laux, Christian, Vienna University of Economics and Business  
Laverde, Mariana, Yale University  
Law, Kelvin, Nanyang Business School  
Lawrence, Alastair, London Business School  
Le, Ahn, Pennsylvania State University  
Le, Anh, University of Pennsylvania  
Leary, Mark, Washington University in St. Louis  
Lecuona, Ramon, Duke University  
Lee, Chang, Korea Advanced Institute of Science and Technology  
Lee, Chang-Yuan, Boston University  
Lee, Chi-Guhn, University of Toronto  
Lee, Chung-Yee, Hong Kong University of Science and Technology  
Lee, Dokyun, Carnegie Mellon University  
Lee, Donald, Yale University  
Lee, Gene Moo, University of British Columbia  
Lee, Hsiao-Hui, National Chengchi University  
Lee, Jeongsik, Drexel University  
Lee, Jongsub, Seoul National University  
Lee, Josh, Brigham Young University  
Lee, Julia, University of Michigan  
Lee, Junghee, Tulane University  
Lee, Kuan-Hui, Seoul National University  
Lee, Kyunghiee, Wayne State University  
Lee, Lian Fen, Boston College  
Lee, Michael, University of California, Irvine  
Lee, Mina, Washington University in St. Louis  
Lee, Moontae, University of Illinois at Chicago  
Lee, SangMok, Washington University in St Louis  
Lee, Sang-yong Tom, Hanyang University  
Lee, Shun-Yang, Northeastern University  
Lee, Sun Young, University College London  
Lefouili, Yassine, Toulouse School of Economics  
Lefrere, Vincent, Institut Mines-Telecom Business School  
Lei, Yanzhe (Murray), Queen's University  
Leibowicz, Benjamin, University of Texas at Austin  
Leiby, Justin, University of Illinois at Urbana-Champaign

Leiponen, Aija, Cornell University  
Leitner, Markus, Vrije Universiteit  
Leitner, Yaron, Federal Reserve Bank of Philadelphia  
Lejarraga, Tomas, University of the Balearic Islands  
Lejeune, Miguel, George Washington University  
Lemmens, Aurélie, Erasmus University  
Leng, Yan, University of Texas at Austin  
Lenox, Michael, University of Virginia  
Leombroni, Matteo, Stanford University  
Leonard, Greg, University of North Carolina at Chapel Hill  
Leonello, Agnese , European Central Bank  
Lepori, Gabriele, University of Southampton  
Lergetporer, Philipp, Ifo Institute for Economic Research  
Leshno, Jacob, University of Chicago  
Leshno, Moshe, Tel-Aviv University  
Lester, Rebecca, Stanford University  
Letina, Igor, University of Bern  
Leung, Alvin Chung Man, City University of Hong Kong  
Leung, Ming, University of California, Irvine  
Levav, Jonathan, Stanford University  
Leveson, Nancy, Massachusetts Institute of Technology  
Levesque, Moren, York University  
Levi, Shai, Tel Aviv University  
Levin, Dan, Ohio State University  
Levine, Ross, University of California, Berkeley  
Levit, Doron, University of Pennsylvania  
Levitt, Jacob, University of Pennsylvania  
Levy, Moshe, Hebrew University of Jerusalem  
Lewellen, Stefan , Pennsylvania State University  
Lewis, Greg, Microsoft Research New England  
Lewis, Joshua, University of Pennsylvania  
Lewis, Ryan, University of Colorado Boulder  
Lewis-Western, Melissa, Brigham Young University  
Leyden, Ben, Cornell University  
L'Haridon, Olivier, University of Rennes 1  
Li, Andrew, Carnegie Mellon University  
Li, Anran, London School of Economics and Political Science  
Li, Beibei, Carnegie Mellon University  
Li, Bin, University of Houston  
Li, Bin, University of Waterloo  
Li, Bo, Tsinghua University  
Li, Chan, University of Kansas  
Li, Charis, Xiamen University  
Li, Chen, Erasmus University  
Li, Congcong, Duquesne University  
Li, Cuihong, University of Connecticut  
Li, Danielle, Massachusetts Institute of Technology  
Li, Dongmei, University of South Carolina

Li, Duan, Chinese University of Hong Kong  
Li, Edward, Baruch College  
Li, Emma, Deakin University  
Li, Erica, Cheung Kong Graduate School of Business  
Li, Frank, University of Waterloo  
Li, Geng, Federal Reserve Board  
Li, Guang, Queen's University  
Li, Haitao, Cheung Kong Graduate School of Business  
Li, Hongyi, University of New South Wales  
Li, Hui, Carnegie Mellon University  
Li, Jia, Wake Forest University  
Li, Jiacui, University of Utah  
Li, Jiasun, George Mason University  
Li, Jie, Shanghai Advanced Institute of Finance  
Li, Jinyun, California State University, Stanislaus  
Li, Jonathan, University of Ottawa  
Li, Jun, University of Michigan  
Li, Jun, University of Texas at Dallas  
Li, Kai, Hong Kong University of Science and Technology  
Li, Kai, University of British Columbia  
Li, Kathleen, University of Texas at Austin  
Li, Kevin, University of California, Riverside  
Li, Krista, Indiana University  
Li, Laura Yue, University of Illinois at Urbana-Champaign  
Li, Lei, Federal Reserve Board  
Li, Manqi, University of Michigan  
Li, Meng, Rutgers University  
Li, Meng, University of Texas at Dallas  
Li, Nan, University of Minnesota  
Li, Ningzhong, University of Texas at Dallas  
Li, Oliver, National University of Singapore  
Li, Qing, Hong Kong University of Science and Technology  
Li, Rong, Syracuse University  
Li, Shan, Baruch College  
Li, Shelley, University of Southern California  
Li, Shengwu, Stanford University  
Li, Sherry, University of Arkansas  
Li, Siqi, Santa Clara University  
Li, Sophia, Rutgers University  
Li, Tao, Santa Clara University  
Li, Tao, University of Florida  
Li, Wei, University of Adelaide  
Li, Wenhao, University of Southern California  
Li, Xi, City University of Hong Kong  
Li, Xi, Newcastle University  
Li, Xi, Temple University  
Li, Xiao-Bai, University of Massachusetts Lowell  
Li, Xiaobo, National University of Singapore

Li, Xiaocheng, Imperial College London  
Li, Xitong, HEC Paris  
Li, Yang, Chinese University of Hong Kong  
Li, Ye, Ohio State University  
Li, Yi, Federal Reserve Board  
Li, Yinghua, Arizona State University  
Li, Yingying, Hong Kong University of Science and Technology  
Li, Zhuoxin (Allen), Boston College  
Liang, Annie, University of Pennsylvania  
Liang, Bing, University of Massachusetts Amherst  
Liang, Chao, Cheung Kong Graduate School of Business  
Liang, Chen, University of Connecticut  
Liang, Hao, Singapore Management University  
Liao, Chenxi, Chinese University of Hong Kong  
Liao, Gordon, Federal Reserve Board  
Liao, Rose, Rutgers University  
Liao, Scott, University of Toronto  
Liaukonyte, Jura, Cornell University  
Libby, Theresa, University of Waterloo  
Liberali, Gui, Erasmus University  
Licht, Amir, Interdisciplinary Center Herzliya  
Lichtendahl, Casey, University of Virginia  
Lie, Erik, University of Iowa  
Liechty, John, Pennsylvania State University  
Light, Bar, Stanford University  
Lightle, John, Virginia Commonwealth University  
Lillo, Fabrizio, Scuola Normale Superiore  
Lim, Andrew, National University of Singapore  
Lim, Kevin, University of Toronto  
Lim, Michael, Seoul National University  
Lim, Sanghee, Johns Hopkins University  
Lim, Sonya, DePaul University  
Lim, Stanley, University of San Diego  
Lim, W. S., National University of Singapore  
Lim, Yun Fong, Singapore Management University  
Limodio, Nicola, Bocconi University  
Lin, Huidi, Northwestern University  
Lin, Jianjing , Rensselaer Polytechnic Institute  
Lin, Leming, University of Pittsburgh  
Lin, Mingfeng, Georgia Institute of Technology  
Lin, Qihang, University of Iowa  
Lin, Shu, Chinese University of Hong Kong  
Lin, Song, Hong Kong University of Science and Technology  
Lin, Tesary, Boston University  
Lin, Tse-Chun, University of Hong Kong  
Lin, Xiaoji, University of Minnesota  
Lin, Yuanfang, University of Guelph  
Lin, Yu-Kai, Georgia State University

Lin, Yupeng, City University of Hong Kong  
Lin, Zhiang (John), University of Texas at Dallas  
Lin, Zihan, Stanford University  
Lincoln, William, Claremont McKenna College  
Lipson, Marc L. , University of Virginia  
Litov, Lubomir, University of Oklahoma  
Liu, Baixiao, Florida State University  
Liu, Ben, City University of Hong Kong  
Liu, Bibo, Tsinghua University  
Liu, Ce, Michigan State University  
Liu, Charles, University of Texas at San Antonio  
Liu, Chengwei, ESMT Berlin  
Liu, CheWei, Indiana University Bloomington  
Liu, Chris, University of Toronto  
Liu, Chuanren, University of Tennessee  
Liu, De, University of Minnesota, Twin Cities  
Liu, Fang, Nanyang Technological University  
Liu, Guangwu, City University of Hong Kong  
Liu, Hening, University of Manchester  
Liu, Hong, Washington University in St. Louis  
Liu, Hongju, Peking University  
Liu, Jianan, University of Hong Kong  
Liu, Jun, University of California, San Diego  
Liu, Laura Xiaolei, Peking University  
Liu, Lin, University of Central Florida  
Liu, Liqun, Texas A&M University  
Liu, Lisa, Columbia University  
Liu, Liu, University of Colorado Boulder  
Liu, Meng, Massachusetts Institute of Technology  
Liu, Mingwei, Rutgers University  
Liu, Nan, Boston College  
Liu, Peggy, University of Pittsburgh  
Liu, Ping, Purdue University  
Liu, Qiang, Purdue University  
Liu, Qihong, University of Oklahoma  
Liu, Qing, Boston University  
Liu, Shannon, University of Toronto  
Liu, Sheng, University of Toronto  
Liu, Tingjun, Cheung Kong Graduate School of Business  
Liu, Xiao, New York University  
Liu, Xiao, University of Utah  
Liu, Xiaoding, Texas A&M University  
Liu, Xin, Renmin University of China  
Liu, Yan, Hong Kong Polytechnic University  
Liu, Yan, Purdue University  
Liu, Yan, Texas A&M University  
Liu, Yang, University of California, Santa Cruz  
Liu, Yang, University of Hong Kong

Liu, Yiming, Humboldt University of Berlin  
Liu, Ying, University of Massachusetts Amherst  
Liu, Yukun, University of Rochester  
Liu, Yunchuan, University of Illinois at Urbana-Champaign  
Livdan, Dmitry, University of California, Berkeley  
Llobet, Gerard, Center for Monetary and Financial Studies  
Lo, Alvis, Boston College  
Lo, Irene, Stanford University  
Lo, Jade, Drexel University  
Lobel, Ilan, New York University  
Lobo, Miguel, INSEAD  
Lochstoer, Lars, Columbia Business School  
Lockhart, Brandon, Clemson University  
Loeb, Martin, University of Maryland  
Loehndorf, Nils, University of Luxembourg  
Loewenstein, George, Carnegie Mellon University  
Löfgren, Åsa, University of Gothenburg  
Loh, Roger, Singapore Management University  
Loke, Gar Goei, National University of Singapore  
Lombardi Yohn, Teri, Emory University  
Londono, Juan M., Federal Reserve Board  
Long, Xiaoyang, University of Wisconsin-Madison  
Lopes Rogo, Rafael, Indiana University Bloomington  
López-Espinosa, Germán, University of Navarra  
Lou, Bowen, University of Pennsylvania  
Lou, Xiaoxia, University of Delaware  
Loudis, Jonathan, University of Chicago  
Louis, Henock, Pennsylvania State University  
Lourie, Ben, University of California, Irvine  
Loutskina, Elena, University of Virginia  
Lovett, Mitchell, University of Rochester  
Lowery, J., University of Texas at Austin  
Lowry, Michelle, Drexel University  
Lu, Fangwen, Renmin University of China  
Lu, Joy, Carnegie Mellon University  
Lu, Mengshi, Purdue University  
Lu, Michelle, McGill University  
Lu, Shijie, University of Houston  
Lu, Susan, Purdue University  
Lu, Xiaomeng, Shanghai Institute for Advanced Studies  
Lu, Yi, Tsinghua University  
Lu, Yingda, Rensselaer Polytechnic Institute  
Lu, Yiqing, New York University Shanghai  
Lu, Yixin, George Washington University  
Lu, Zhongjin, University of Georgia  
Lubensky, Dmitry, Amazon  
Luca, Michael, Harvard Business School  
Lucier, Brendan, Microsoft Research New England

Luo, Dan, Shanghai University of Finance and Economics  
Luo, Hong, Harvard Business School  
Luo, Jiao, University of Minnesota  
Luo, Lan, University of Southern California  
Luo, Sirong, Shanghai University of Finance and Economics  
Lurie, Jon, Dartmouth-Hitchcock Medical Center  
Lusch, Stephen, Texas Christian University  
Luz, Vitor, University of British Columbia  
Lyandres, Evgeny, Boston University  
Lykouris, Thodoris, Microsoft Research New York City  
Lyle, Matthew, Northwestern University  
Lynch, Daniel, University of Wisconsin-Madison  
Lynch, John, University of Colorado Boulder  
Lyons, Liz, University of California, San Diego  
M Y, Meghanath, Carnegie Mellon University  
Ma, Guang, McGill University  
Ma, Hongyao, UBER  
Ma, Juan, INSEAD Asia Campus  
Ma, Kebin, University of Warwick  
Ma, Liye, University of Maryland  
Ma, Mark, University of Pittsburgh  
Ma, Matthew, Southern Methodist University  
Ma, Song, Yale University  
Ma, Will, Columbia University  
Maas, Victor, University of Amsterdam  
Maccheroni, Fabio, University of Bocconi  
Macchiavelli, Marco, Board of Governors of the Federal Reserve System  
Macciocchi, Daniele, University of Miami  
Mace, Chris, University of Utah  
MacGarvie, Megan, Boston University  
Macher, Jeffrey, Georgetown University  
Macias, Antonio, Baylor University  
Macis, Mario, Johns Hopkins University  
MacKay, Alexander, Harvard University  
Macnamara, Gregory, Stanford University  
Maddix, Nathan, Max Planck Institut for Research on Collective Goods  
Madsen, Joshua, University of Minnesota, Twin Cities  
Mahlendorf, Matthias, Frankfurt School of Finance & Management  
Mahmood, Ammara, Wilfrid Laurier University  
Maillart, Thomas, University of Geneva  
Mak, Ho-Yin, University of Oxford  
Mak, Vincent, University of Cambridge  
Makhdoumi, Ali, Massachusetts Institute of Technology  
Malamud, Semyon, Swiss Federal Institute of Technology Lausanne  
Malekian, Azarakhsh, University of Toronto  
Malherbe, Frederic, University College London  
Malik, Nikhil, Carnegie Mellon University  
Malik, Sara, Stanford University

Malinova, Katya, McMaster University  
Malkhi, Dahlia, Novi Financial  
Malkoc, Selin, Ohio State University  
Malladi, Suraj , Stanford University  
Malladi, Vishwakant, Indian School of Business  
Mallipeddi, Rakesh, Tulane University  
Mamaysky, Harry, Columbia University  
Manconi, Alberto, Bocconi University  
Manela, Asaf, Washington University in St. Louis  
Mangum, Kyle, Georgia State University  
Mani, Ankur, University of Minnesota  
Mani, Vidya, University of Virginia  
Mankad, Shawn, Cornell University  
Mann, William, University of California, Los Angeles  
Mannucci, Pier , London Business School  
Manshadi, Vahideh, Yale University  
Mansi, Sattar, Virginia Polytechnic Institute and State University  
Mantegazza, Giacomo, Stanford University  
Mao, Connie, Temple University  
Mao, Yifei, Cornell University  
Maoret, Massimo , University of Navarra  
March, Christoph, Technische Universität München  
Marchetti, Arianna, London Business School  
Marchica, Maria-Teresa, University of Manchester  
Marechal, Michel Andre, University of Zurich  
Marengo, Luigi, Luiss Guido Carli  
Marfè, Roberto, Collegio Carlo Alberto  
Marinacci, Massimo, Bocconi University  
Marinesi, Simone, University of Pennsylvania  
Marinovic, Ivan, Stanford University  
Mariotti, Marco, Queen Mary University of London  
Markakis, Mihalis, IESE Business School  
Markarian, Garen, WHU - Otto Beisheim School of Management  
Markou, Panos, University of Virginia  
Markov, Stanimir, University of Texas at Dallas  
Marla, Lavanya, University of Illinois at Urbana-Champaign  
Marotta, Veronica, University of Minnesota  
Marshall, Nathan, University of Colorado Boulder  
Martin, Kirsten, George Washington University  
Martin, Melissa, University of Illinois at Chicago  
Martin, Sebastien, Northwestern University  
Martineau, Charles, University of Toronto  
Martinez, David, Universidad Carlos III de Madrid  
Martinez, Jose, University of Connecticut  
Martinez-Correa, Jimmy, Copenhagen Business School  
Martinez-Jerez, F. Asis, University of Notre Dame  
Maruping, Likoebe, Georgia State University  
Marx, Benjamin, University of Illinois

Marx, Matt, Cornell University  
Masaki, Aoyagi, Osaka University  
Masatlioglu, Yusufcan, University of Michigan  
Mason Lobo, Jennifer , University of Virginia  
Massa, Massimo, INSEAD  
Massoud, Nadia, University of Melbourne  
Mastrogiorgio, Mariano, IE Business School  
Mateos de Cabo, Ruth, CEU San Pablo  
Matsusaka, John, University of Southern California  
Matsushima, Noriaki, Osaka University  
Matthews, William, University of Cambridge  
Maturana, Gonzalo, Emory University  
Matveyev, Egor, Massachusetts Institute of Technology  
Matz, Sandra, Columbia University  
Mauersberger, Felix, University of Bonn  
Maurer, Thomas, Washington University  
Mawdsley, John, HEC Paris  
Mayhew, Brian, University of Wisconsin-Madison  
Mayya, Raveesh, New York University  
Mayzlin, Dina, Yale University  
Mazumder, Rahul, Massachusetts Institute of Technology  
McAdams, David, Duke University  
McCoy, John, University of Pennsylvania  
McCullough, Jeffrey , University of Michigan  
McDonald, Rebecca, University of Birmingham  
McDonnell, Mary-Hunter, Georgetown University  
McElfresh, Duncan, University of Maryland, College Park  
McElheran, Kristina, University of Toronto  
McFowland, Edward, University of Minnesota  
McGuire, Sean, Texas A&M University  
McInnis, John, University of Texas at Austin  
McKenzie, Craig, University of California, San Diego  
McKenzie, David, World Bank Group  
McKeon, Stephen, University of Oregon  
McMahan, Christopher, Clemson University  
McMahon, Michael, University of Oxford  
McManus, Brian, University of North Carolina at Chapel Hill  
McMullin, Jeff, Indiana University  
McShane, Blakeley, Northwestern University  
Mechtel, Mario, Leuphana University of Lüneburg  
Medhat, Mamdouh, Cass Business School  
Medina, Paolina, Texas A&M University  
Meer, Jonathan, Texas A&M University  
Megginson, William, University of Oklahoma  
Mehra, Ajay, University of Kentucky  
Mehrotra, Mili, University of Illinois at Urbana-Champaign  
Mehta, Mihir, University of Michigan  
Mehta, Sameer, University of Illinois at Urbana-Champaign

Mei, Xiaoling, Xiamen University  
Meier, Armando, University of Lausanne  
Mejia, Jorge, Indiana University  
Melero, Eduardo, Universidad Carlos III de Madrid  
Melessa, Samuel, University of Iowa  
Mello, Antonio, University of Wisconsin-Madison  
Melo, Emerson, Indiana University  
Melville, Nigel, University of Michigan  
Meng, Juanjuan, Peking University  
Meng, Kyle, University of California, Santa Barbara  
Meng, Lesley, Yale University  
Meng, Xiaojing, New York University  
Menkhoff, Lukas, Leibniz University Hannover  
Menkveld, Albert, Vrije Universiteit  
Menon, Nirup, George Mason University  
Menon, Syam, University of Texas at Dallas  
Mergenthaler, Richard, University of Arizona  
Merkle, Christoph, Aarhus University  
Merkle, Edgar, University of Missouri  
Merkley, Kenneth, Indiana University  
Merluzzi, Jennifer, George Washington University  
Mersereau, Adam, University of North Carolina at Chapel Hill  
Metcalf, Robert, Boston University  
Metzger, Daniel, Stockholm School of Economics  
Meyer, Joachim, Tel Aviv University  
Meyer, Steffen, University of Southern Denmark  
Meyer-Ter-Vehn, Moritz, University of California, Los Angeles  
Mezzanotti, Filippo, Northwestern University  
Miao, Bin, Shanghai University of Finance and Economics  
Miao, Sentao, McGill University  
Michaeli, Beatrice, University of California, Los Angeles  
Michels, Jeremy, University of Pennsylvania  
Michenaud, Sebastien, DePaul University  
Miettinen, Topi, Hanken School of Economics  
Mihm, Jurgen, INSEAD  
Milidonis, Andreas, University of Cyprus  
Miller, Alex, University of Pennsylvania  
Miller, Brian, Indiana University  
Miller, Elizabeth, University of Massachusetts Amherst  
Miller, Joshua, University of Melbourne  
Millner, Antony, London School of Economics and Political Science  
Mills, Alex, Indiana University Bloomington  
Miltersen, Kristian, Copenhagen Business School  
Mimra, Wanda, ETH Zürich  
Min, Seungki, Columbia University  
Ming, Liu, Chinese University of Hong Kong  
Minnis, Michael, University of Chicago  
Minson, Julia, Harvard University

Mintz, Yonatan, University of Wisconsin-Madison  
Minutti-Meza, Miguel , University of Miami  
Mirzaeian, Neda, Carnegie Mellon University  
Mishra, Anant, University of Minnesota  
Mišić, Velibor, University of California, Los Angeles  
Mislavsky, Robert, Johns Hopkins University  
Misra, Kanishka, University of California, San Diego  
Misra, Sanjog, University of California, Los Angeles  
Mitra, Indrajit, University of Michigan  
Mitrofanov, Dmitry, New York University  
Mittendorf, Brian, Ohio State University  
Mityakov, Sergey, Florida State University  
Mizruchi, Mark, University of Michigan  
Mkrtychyan, Anahit, Northeastern University  
Mobasserri, Sanaz, University of California, Berkeley  
Mochon, Daniel, Tulane University  
Modaresi, Sajad, University of North Carolina at Chapel Hill  
Moehlmann, Mareike, University of Warwick  
Moers, Frank, Maastricht University  
Moffatt, Peter, University of East Anglia  
Mohamed, Moataz, McMaster University  
Mohanam, Manoj, Duke University  
Mohseni, Mahdi, Texas A&M University  
Moinas, Sophie, Toulouse School of Economics  
Molavi, Pooya, University of Chicago  
Molitor, David, University of Illinois at Urbana-Champaign  
Mollerstrom, Johanna, George Mason University  
Mollick, Ethan, University of Pennsylvania  
Momot, Ruslan, HEC Paris  
Monachou, Faidra, Stanford University  
Mondria, Jordi, University of Toronto  
Monin, Benoit, Stanford University  
Montibeller, Gilberto, Loughborough University  
Moon, Alice, University of Pennsylvania  
Moon, James, Georgia Institute of Technology  
Moon, Jihwan, University of New South Wales  
Moon, Ken, University of Pennsylvania  
Moon, S. Katie, University of Colorado Boulder  
Moore, David, University of Kentucky  
Moore, Don, University of California, Berkeley  
Moore, Ozias, Lehigh University  
Moore, Sarah, University of Alberta  
Moreira, Alan, Yale University  
Morellec, Erwan, Swiss Federal Institute of Technology Lausanne  
Moreno, Antonio, Harvard Business School  
Morgenstern, Ilan, Stanford University  
Morita, Hodaka, Hitotsubashi University  
Morris, Arthur, Hong Kong University of Science and Technology

Morse, Adair, University of California, Berkeley  
Mortal, Sandra, University of Alabama  
Moseley, Ben, Carnegie Mellon University  
Moser, Donald, University of Pittsburgh  
Moser, Petra, New York University  
Moshary, Sarah, University of Chicago  
Mostagir, Mohamed, University of Michigan  
Mota, Lira, Columbia University  
Moulin, Herve, University of Glasgow  
Moyen, Nathalie, University of Colorado Boulder  
Mu, Liying, University of Delaware  
Mueller, Daniel, University of Innsbruck  
Mueller, Wieland, University of Vienna  
Muir, Tyler, Yale University  
Mukerji, Sujoy, Queen Mary University of London  
Mukharlamov, Vladimir, Georgetown University  
Mukherjee, Abhiroop, Hong Kong University of Science and Technology  
Mukherjee, Rajiv, Southern Methodist University  
Mukherjee, Ujjal, University of Illinois at Urbana-Champaign  
Müller-Trede, Johannes, University of Navarra  
Mullins, William, University of California, San Diego  
Mummalaneni, Simha, University of Washington  
Munari, Cosimo, University of Zurich  
Muñoz-Herrera, Manuel, New York University Abu Dhabi  
Muravyev, Dmitriy, Michigan State University  
Murawski, Carsten, University of Melbourne  
Murciano-Goroff, Raviv, Boston University  
Murfin, Justin, Cornell University  
Murooka, Takeshi, Osaka University  
Murota, Kazuo, Tokyo Metropolitan University  
Murphy, Dermot, University of Illinois at Chicago  
Murray, Scott, Georgia State University  
Murthi, B. P. S., University of Texas at Dallas  
Murthy, Karthyek, Singapore University of Technology and Design  
Musalem, Andres, Universidad de Chile  
Muslu, Volkan, University of Houston  
Muthulingam, Suresh, Pennsylvania State University  
Naaraayanan, S.Lakshmi, Hong Kong University of Science and Technology  
Nadarajah, Selvaprabu, University of Illinois at Chicago  
Nafziger, Julia, Aarhus University  
Nagaraj, Abhishek, University of California, Berkeley  
Nageswaran, Leela, University of Washington  
Nagle, Frank, Harvard Business School  
Najafi, Sajjad, HEC Paris  
Najafi-Asadolahi, Sami, Santa Clara University  
Nakajima, Makoto, Federal Reserve Bank of Philadelphia  
Nalebuff, Barry, Yale University  
Nallareddy, Suresh, Duke University

Namkoong, Hongseok, Columbia University  
Nanda, Dhananjay, University of Miami  
Nanda, Ramana, Harvard Business School  
Nandkumar, Anand, Indian School of Business  
Narayanamoorthy, Gans, Tulane University  
Nasiry, Javad, McGill University  
Nasser, Sherif, Cornell University  
Nassiri, Shima, University of Michigan  
Nataraj, Shanthi, RAND Corporation  
Natarajan, Karthik, Singapore University of Technology and Design  
Natarajan, Karthik, University of Minnesota  
Natividad, Gabriel, University of Piura  
Naumovska, Ivana, INSEAD  
Neamtiu, Monica, University of Arizona  
Neckerman, Susanne, University of Chicago  
Nederveen Pieterse, Anne, Erasmus University  
Nediak, Mikhail, Queen's University  
Negro, Giacomo, Emory University  
Neklyudov, Artem, Lancaster University  
Nelson, Karen, Texas Christian University  
Nelson, Leif, University of California, Berkeley  
Neretina, Ekaterina, University of Southern California  
Neu, Gergely, Pompeu Fabra University  
Neugebauer, Tibor, University of Luxembourg  
Neuhann, Daniel, University of Texas at Austin  
Neuhierl, Andreas, University of Notre Dame  
Nevskaya, Yulia, Olin Business School  
Newman, Andrew, University of South Carolina  
Newton, Nate, Florida State University  
Ng, David, Cornell University  
Ng, Lilian, York University  
Ng, Szu Hui, National University of Singapore  
Ng, Travis, Chinese University of Hong Kong  
Ngo, Phong, Australian National University  
Nguyen, Phuong-Anh, York University  
Nguyen, Thanh, Purdue University  
Nguyen, Viet Anh, École Polytechnique Federale de Lausanne  
Ni, Chenkai, Fudan University  
Ni, Jian, Johns Hopkins University  
Nian, Tingting, University of California, Irvine  
Niazadeh, Rad, University of Chicago  
Nickerson, Jackson, Washington University in St. Louis  
Nickerson, Jordan, Massachusetts Institute of Technology  
Nie, Xinkun, Stanford University  
Niederhoff, Julie, Syracuse University  
Niehaus, Paul, University of California, San Diego  
Niehuas, Greg, University of South Carolina  
Niesen, Petra, Karlsruhe Institute of Technology

Nielsen, Kasper, Hong Kong University of Science and Technology  
Nielsen, Kirby , Ohio State University  
Nielson, Jed, Pennsylvania State University  
Niessen-Ruenzi, Alexandra, University of Mannheim  
Nikiforakis, Nikos, New York University Abu Dhabi  
Nikolaev, Alexander, University at Buffalo-The State University of New York  
Nikzad, Afshin, Stanford University  
Ning, Jie, Case Western Reserve University  
Ning, Z. Eddie, Cheung Kong Graduate School of Business  
Nishida, Mitsukuni, Johns Hopkins University  
Nishihara, Michi, Osaka University  
Nittala, Lakshmi, University of Dayton  
Niu, Baozhuang, Sun Yat-sen University  
Noda, Shunya, University of British Columbia  
Nogales, Francisco Javier, Universidad Carlos III de Madrid  
Noh, Suzie, Massachusetts Institute of Technology  
Nohadani, Omid, Northwestern University  
Norden, Lars, Fundação Getulio Vargas  
Norli, Oyvind, BI Norwegian Business School  
Norton, Michael, Harvard Business School  
Nosenzo, Daniele, Aarhus University  
Noton, Carlos, University of Chile  
Noussair, Charles, University of Arizona  
Novelli, Elena, City, University of London  
Novemsky, Nathan, Yale University  
Novikov, Zhanna, Vanderbilt University  
Nozawa, Yoshio, Hong Kong University of Science and Technology  
Nunez, Matias, Centre National de la Recherche Scientifique  
Nunnari, Salvatore , Bocconi University  
Nyberg, Peter, Aalto University  
Obizhaeva, Anna, New Economic School  
Obloj, Tomasz, HEC Paris  
Obukhova, Elena, McGill University  
Oechssler, Joerg, University of Heidelberg  
Oehmke, Martin, London School of Economics and Political Science  
Oery, Aniko, Yale University  
Oesch, David, University of Zurich  
Oettl, Alex, Georgia Institute of Technology  
Oexl, Regine, University of Innsbruck  
Ofek, Elie, Harvard Business School  
Offerman, Theo, University of Amsterdam  
Officer, Micah, Loyola Marymount University  
Oh, Hyelim, National University of Singapore  
Oh, Min-hwan, Columbia University  
O'Hanley, Jesse, University of Kent  
Ohlrogge, Michael, New York University Law School  
Ohyama, Atsushi, Hitotsubashi University  
Olivares-Nadal, Alba, University of Chicago

Olsen, Tava, University of Auckland  
Olsen, Trond, Norwegian School of Economics  
Olson, Daniel, University of Washington  
Omartian, Jim, University of Michigan  
Onali, Enrico, University of Exeter  
Onderstal, Sander, University of Amsterdam  
Ongena, Steven, University of Zurich  
Opp, Christian, University of Rochester  
Oraopoulos, Nektarios, Cambridge University  
Orhun, A. Yesim, University of Michigan  
Orlov, Dmitry, University of Rochester  
Ormazabal, Gaizka, IESE Business School  
Ormecı, Lerzan, Koç University  
Orquin, Jacob, Aarhus University  
Orsdemir, Adem, University of California, Riverside  
Osadchiy, Nikolay, Emory University  
Osborne, Matthew, University of Toronto  
Ostler, James, University of Michigan  
Ottaviani, Marco, Bocconi University  
Otto, Clemens, HEC Paris  
Ottonello, Giorgio, Nova School of Business and Economics  
Ottoni-Wilhelm, Mark, Indiana University-Purdue University  
Ouimet, Paige, University of North Carolina  
Ovchinnikov, Anton, Queen's University  
Ovtchinnikov, Alexei, HEC Paris  
Owens, Edward, University of Utah  
Ozaki, Hiroyuki, Keio University  
Ozbay, Erkut, University of Maryland  
Ozdenoren, Emre, London Business School  
Ozel, Naim Bugra, University of Texas at Dallas  
Ozer, Gorkem, University of Maryland, College Park  
Ozkan, Erhun, Koç University  
Oztekin, Asil, University of Massachusetts Lowell  
P. Momtaz, Paul, University of California, Los Angeles  
Paat, Joe, Eidgenössische Technische Hochschule Zurich  
Pacelli, Joseph, Indiana University  
Pacheco, Desiree, Portland State University  
Pacheco-de-Almeida, Gonçalo, HEC Paris  
Pachur, Thorsten, Max Planck Institute for Human Development  
Packard, Heidi, University of Michigan  
Packer, Frank, Bank for International Settlements  
Paddrik, Mark, U.S. Department of the Treasury Office of Financial Research  
Padilla, Nicolas, Columbia University  
Pagano, Marco, University of Naples Federico II  
Page, Lionel, Queen's University  
Pagel, Michaela, Columbia University  
Pagnozzi, Marco, University of Naples Federico II  
Pai, Mallesh, Rice University

Paik, Yongwook, Korea Advanced Institute of Science and Technology  
Pais, Joana, Lisbon School of Economics and Management  
Palan, Stefan, University of Graz  
Palazzo, Berardino, Federal Reserve Board  
Palczewski, Jan, University of Leeds  
Palida, Ali , Massachusetts Institute of Technology  
Palley, Asa, Indiana University Bloomington  
Palmer, Donald, University of California, Davis  
Palomeras, Neus, Universidad Carlos III de Madrid  
Pan, Xiajun, University of Florida  
Panayotov, George, Hong Kong University of Science and Technology  
Panchamgam, Kiran, Oracle Corp.  
Pandey, Vivek , University of Southern California  
Pang, Guodong, Pennsylvania State University  
Pang, Min-Seok, Temple University  
Pang, Zhan, Purdue University  
Panico, Claudio, Bocconi University  
Pant, Gautam, University of Iowa  
Papakonstantinou, Filippos, King's College London  
Papanastasiou, Yiangos, University of California, Berkeley  
Papanicolaou, Andrew, New York University  
Papier, Felix, ESSEC Business School  
Parakhonyak, Alexei, University of Oxford  
Park, Andreas, University of Toronto  
Park, Jiyong, University of North Carolina at Greensboro  
Park, Minjung, University of California, Berkeley  
Park, Sangyoon, University of Hong Kong  
Park, Sungho, Seoul National University  
Park, Young-Hoon, Cornell University  
Parker, Chris, American University  
Parker, Jeffrey, University of Illinois at Chicago  
Parker, Rodney, Indiana University Bloomington  
Parker-Lue, Sara, Rutgers University  
Parlaktürk, Ali, University of North Carolina at Chapel Hill  
Parlatore, Cecilia, New York University  
Parra, Alvaro, University of British Columbia  
Pataconi, Andrea, University of East Anglia  
Patatoukas, Panos, University of California, Berkeley  
Patil, Shefali, University of Texas at Austin  
Pattabhiramaiah, Adithya, Georgia Institute of Technology  
Patterson, Kelly , University of Southern California  
Pauwels, Koen, Northeastern University  
Pauwels, Laurent, University of Sydney  
Pavlin, Michael, Wilfrid Laurier University  
Pavlov, Valery, University of Auckland  
Pawliczek, Andrea, University of Colorado  
Pawlina, Grzegorz, Lancaster University  
Paye, Bradley, Virginia Polytechnic Institute and State University

Payne, Richard, Cass Business School  
Payzan-LeNestour, Elise, University of New South Wales  
Pearce, Graeme , University of Exeter  
Pearcy, Jason, Montana State University  
Pedraza-Martinez, Alfonso, Indiana University Bloomington  
Peeters, Thomas, Erasmus University  
Pei, Amy (Lei), University of Southern California  
Peijnenburg, Kim, EDHEC Business School  
Pekgun, Pelin, University of South Carolina  
Pelger, Markus, Stanford University  
Pelizzon, Loriana, Universita' Ca' Foscari di Venezia  
Pelsser, Antoon, Maastricht University  
Pender, Jamol, Cornell University  
Peng, Cameron, London School of Economics and Political Science  
Peng, Chih-Hung, National Chengchi University  
Peng, Lin, Baruch College  
Peng, Xianhua, Peking University  
Peng, Xiaoshan, Indiana University Bloomington  
Peng, Yijie, Peking University  
Penno, Mark, University of Iowa  
Perchet, Vianney, CREST, ENSAE, France  
Perdikaki, Olga, University of South Carolina  
Peres, Renana, Hebrew University of Jerusalem  
Perez Cavazos, Gerardo, Harvard Business School  
Perfecto, Hannah, Washington University in St. Louis  
Pernoud, Agathe, Stanford University  
Perrakis, Stylianos, Concordia University  
Peter, Richard, University of Iowa  
Peters, Ellen, University of Oregon  
Peters, Florian, University of Amsterdam  
Peters, Kay, University of Hamburg  
Petersen, Niels, University of Southern Denmark  
Peterson, Kyle, University of Oregon  
Petkova, Ralitsa, Case Western Reserve University  
Petrasek, Lubomir, Federal Reserve Board  
Petroni, Silvio, Bocconi University  
Petrie, Ragan, Texas A&M University  
Petrik, Marek, University of New Hampshire  
Petrov, Evgeny, Hong Kong University of Science and Technology  
Pettersson, William, University of Glasgow  
Peukert, Christian, University of Lausanne  
Peura, Heikki, Imperial College London  
Peysakhovich, Alexander, Facebook  
Pezanis-Christou, Paul, University of Adelaide  
Phan, Hieu, University of Massachusetts Lowell  
Phan, Toan, Federal Reserve Bank of Richmond  
Phan, Tuan, National University of Singapore  
Phillips, Blake, University of Waterloo

Phillips, Damon, Columbia University  
Phillips, Gordon, Dartmouth College  
Piatti, Ilaria, University of Oxford  
Piazza, Alessandro, Rice University  
Pierret, Diane, University of Luxembourg  
Pierson, Emma, Microsoft Research  
Piezunka, Henning, INSEAD  
Pillai, Sandeep, Bocconi University  
Pinardon-Touati, Noemie, HEC Paris  
Pindyck, Robert, Massachusetts Institute of Technology  
Pinkowitz, Lee, Georgetown University  
Pinto, Jedson, University of Texas at Dallas  
Pisciotta, Kevin, University of Kansas  
Pitesa, Marko, Singapore Management University  
Piveteau, Paul, Johns Hopkins University  
Plaks, Jason, University of Toronto  
Pleskac, Timothy, University of Kansas  
Png, Ivan, National University of Singapore  
Podimata, Charikleia, Harvard University  
Pollet, Joshua, University of Illinois  
Polo, Andrea, Luiss Guido Carli  
Ponti, Giovanni, University of Alicante  
Pontikes, Elizabeth, University of California, Davis  
Pope, Devin, University of Chicago  
Popkowski-Leszczyc, Peter, University of Queensland  
Possamai, Dylan, Columbia University  
Post, Thierry, Koç University  
Postek, Krzysztof, Technion Israel Institute of Technology  
Pouget, Sébastien, Toulouse School of Economics  
Povel, Paul, University of Houston  
Powell, Mike, Northwestern University  
Pozner, Jo-Ellen, Santa Clara University  
Prat, Andrea, Columbia University  
Prat, Julian, École Polytechnique  
Presslee, Adam, University of Waterloo  
Previtero, Alessandro, Indiana University  
Prilmeier, Robert, Tulane University  
Prince, Jeffrey, Indiana University  
Prokopczuk, Marcel, Leibniz University Hannover  
Prokopyev, Oleg, University of Pittsburgh  
Proserpio, Davide, University of Southern California  
Provost, Foster, New York University  
Prowse, Victoria, Purdue University  
Pu, Jingchuan, Pennsylvania State University  
Pu, Xiaoling, Kent State University  
Puckett, Andy, University of Tennessee  
Puranam, Dinesh, University of Southern California  
Puranam, Phanish, INSEAD

Purohit, Debu, Duke University  
Pycia, Marek, University of Zurich  
Pye, Jessica, Arizona State University  
Pyun, SungJune, National University of Singapore  
Qi, Anyan, University of Texas at Dallas  
Qian, Meijun, Australian National University  
Qian, Pengyu, Columbia University  
Qian, Wenlan, National University of Singapore  
Qian, Yi, University of British Columbia  
Qian, Yiming, University of Connecticut  
Qin, Yu, National University of Singapore  
Qiu, Jianying, Radboud Universiteit  
Qiu, Jiaping, McMaster University  
Qiu, Liangfei, University of Florida  
Qiu, Yue, Temple University  
Qiu, Yueming (Lucy), University of Maryland, College Park  
Qu, Xiangyu, French National Centre for Scientific Research  
Quercia, Simone, University of Verona  
Quinn, Phil, University of Washington  
Quinn, Simon, Oxford University  
Quintane, Eric, University of Los Andes  
Raffiee, Joseph, University of Southern California  
Rafieian, Omid, University of Washington  
Raghabendra, KC, Rollins College  
Rahimian, Hamed, Ohio State University  
Rahmandad, Hazhir, Massachusetts Institute of Technology  
Rahmani, Morvarid, Georgia Institute of Technology  
Rai, Aneesh, University of Pennsylvania  
Raj, Manav, New York University  
Ramachandran, Karthik, Georgia Institute of Technology  
Ramasubbu, Narayan, University of Pittsburgh  
Ramcharan, Rodney, University of Southern California  
Ramgolam, Dina, University of Texas at Austin  
Ramos, Felipe, FUCAPE Business School  
Rand, William, University of Maryland  
Ranehill, Eva, University of Zurich  
Rangan, Srinivasan, Indian Institute of Management Bangalore  
Ranganathan, Aruna, Stanford University  
Ransbotham, Sam, Boston College  
Rantakari, Heikki, University of Rochester  
Rantala, Ville, University of Miami  
Rao, Anita, Stanford University  
Rao, Raghunath, University of Texas at Austin  
Rao, Vithala, Cornell University  
Rapach, Dave, Washington University in St Louis  
Rapach, David, Saint Louis University  
Rath, Sandeep, University of North Carolina at Chapel Hill  
Rau, Holger, University of Goettingen

Rau, Raghu, University of Cambridge  
Rauter, Thomas, University of Chicago  
Ravid, Doron, University of Chicago  
Ravid, S., Yeshiva University  
Ravindran, Kiron, IE Business School  
Rawson, Caleb, University of Arkansas  
Ray, Saibal, McGill University  
Read, Daniel, Durham University  
Recalde, Maria, University of Melbourne  
Rees-Jones, Alex, Cornell University  
Regnier, Eva, Naval Postgraduate School  
Reguant, Mar, Northwestern University  
Rehbeck, John, Ohio State University  
Reiff, Joseph, University of California, Los Angeles  
Reiley, David , Pandora  
Reimers, Imke, Northeastern University  
Reinholtz, Nicholas, University of Colorado Boulder  
Reisinger, Markus, WHU - Otto Beisheim School of Management  
Relihan, Lindsay, London School of Economics and Political Science  
Ren, Justin, Boston University  
Ren, Yufei, University of Minnesota, Duluth  
Renne, Jean-Paul, University of Lausanne  
Renneboog, Luc, Tilburg University  
Reppen, Max, Princeton University  
Reschke, Brian, Brigham Young University  
Reshef, Oren, Washington University in St Louis  
Resutek, Robert, University of Georgia  
Rettl, Daniel, University of Georgia  
Reuben, Ernesto, New York University  
Rey Biel, Pedro, Ramon Llull University  
Rey, Patrick, Toulouse 1 University Capitole  
Reynaert, Mathias, Toulouse School of Economics  
Reza, Sadat, Nanyang Technological University  
Reza, Syed, Binghamton University  
Rhodes, Adrienne, Texas A&M University  
Rhodes, Andrew, Toulouse School of Economics  
Rhue, Lauren, University of Maryland, College Park  
Rice, Sarah, Texas A&M University  
Richmond, Robert, New York University  
Rick, Scott, University of Michigan  
Riddick, Leigh, American University  
Riddiough, Steven, University of Melbourne  
Ridley, David, Duke University  
Riedl, Arno, Maastricht University  
Riedl, Christoph, Northeastern University  
Rietveld, Joost, University College London  
Rietzschel, Eric, University of Groningen  
Riley-Bowles, Hannah, Harvard University

Rime, Dagfinn, BI Norwegian Business School  
Riordan, Ryan, Queen's University  
Rios, Ignacio, Stanford University  
Rishika, Rishika, North Carolina State University  
Rivas, Fernanda, Middle East Technical University  
Rivera, Alejandro, University of Texas at Dallas  
Roach, Michael, Cornell University  
Robatto, Roberto, University of Wisconsin-Madison  
Robbett, Andrea, Middlebury College  
Robe, Michel A. , University of Illinois at Urbana-Champaign  
Robinson, Carly, Harvard University  
Rocha, Vera, Handelshojskolen  
Roche, Maria Patricia, Georgia Institute of Technology  
Rock, Daniel, University of Pennsylvania  
Rockstuhl, Thomas, Nanyang Technological University  
Roende, Thomas, Copenhagen Business School  
Roet-Green, Ricky, University of Rochester  
Roger, Patrick, Strasbourg University  
Rogers, Todd, Harvard Kennedy School  
Roider, Andreas, University of Regensburg  
Rojo Arjona, David, Chapman University  
Romanosky, Sasha, RAND Corporation  
Romero, Gonzalo, University of Toronto  
Romero, Julian, University of Arizona  
Rong, Rong, University of Massachusetts Amherst  
Rong, Ying, Shanghai Jiaotong University  
Ronn, Ehud, University of Texas at Austin  
Rooderkerk, Robert, Erasmus University  
Roos, Jason, Erasmus University  
Rosato, Antonio, University of Technology Sydney  
Rosen, Richard, Federal Reserve Bank of Chicago  
Rosi, Alessia, University of Pavia  
Ross, David, University of Florida  
Ross, Thomas, University of British Columbia  
Rossi, Alberto, University of Maryland  
Rossi, Andrea, University of Arizona  
Rossi, Federico, Purdue University  
Rossi, Marco, Texas A&M University  
Rossi, Stefano, Bocconi University  
Rosu, Ioanid, HEC Paris  
Rotaru, Kristian, Monash University  
Roth, Yefim, University of Haifa  
Rothenberg, Naomi, University of Alberta  
Rouen, Ethan, Harvard Business School  
Roussellet, Guillaume, McGill University  
Rowthorn, Robert, University of Cambridge  
Rozenbaum, Oded, George Washington University  
Ru, Hong, Nanyang Technological University

Ruan, Tianyue, National University of Singapore  
Rubel, Olivier, University of California, Davis  
Rubineau, Brian, McGill University  
Ruchti, Thomas, Carnegie Mellon University  
Rudi, Nils, Yale University  
Ruef, Martin, Duke University  
Ruenzi, Stefan, University of Mannheim  
Ruff, Daniel, University of Pennsylvania  
Rui, Huaxia, University of Rochester  
Rusmevichientong, Paat, University of Southern California  
Russo, Dan, Columbia University  
Rustichini, Aldo, University of Minnesota  
Rusticus, Tjomme, University of Minnesota, Twin Cities  
Rutherford, Ronald, University of South Florida  
Rutz, Oliver, Yale University  
Ryan, Chris, University of British Columbia  
Ryan, Matthew, Auckland University of Technology  
Rytchkov, Oleg, Temple University  
Ryvkin, Dmitry, Florida State University  
Ryzhov, Ilya, University of Maryland  
Saban, Daniela, Stanford University  
Sabnis, Gaurav, Stevens Institute of Technology  
Saccardo, Silvia, Carnegie Mellon University  
Sackett, Aaron, University of St. Thomas  
Sade, Orly, Hebrew University of Jerusalem  
Sadoff, Sally, University of California, San Diego  
Saeedi, Maryam, Carnegie Mellon University  
Saghafian, Soroush, Harvard University  
Saglam, Mehmet, Princeton University  
Saha, Rajib, Indian School of Business  
Sahin, Ozge, Johns Hopkins University  
Sahni, Navdeep, Stanford University  
Sahoo, Nachiketa, Boston University  
Saidi, Farzad, Boston University  
Saifee, Danish, University of Alabama  
Sakhartov, Arkadiy, University of Pennsylvania  
Saleh, Fahad, McGill University  
Salm, Martin, Tilburg University  
Salmon, Tim, Southern Methodist University  
Salvagnin, Domenico, University of Padua  
Sambalaibat, Batchimeg, Indiana University  
Samek, Anya, University of Southern California  
Samila, Sampsa, IESE Business School  
Sammon, Marco, Northwestern University  
Samtani, Sagar, University of South Florida  
Samuels, Delphine, University of Chicago  
Sandikci, Burhaneddin, University of Chicago  
Sandino, Tatiana, Harvard University

Sandulescu, Mirela, University of Lugano  
Sankaranarayanan, Sriram, Polytechnique Montreal  
Sannino, Francesco, Frankfurt School of Finance & Management  
Santaló Mediavilla, Juan, IE Business School  
Santamaria, Simone, National University of Singapore  
Santos, Francisco, Norwegian School of Economics  
Santosh, Shrihari, University of Colorado Boulder  
Santos-Pinto, Luis, University of Lausanne  
Sanyal, Pallab, George Mason University  
Sapiezynski, Piotr, Northeastern University  
Saretto, Alessio, University of Texas at Dallas  
Sarno, Lucio, Cass Business School  
Sarvary, Miklos, Columbia University  
Satopaa, Ville, INSEAD  
Sauermann, Henry, European School of Management and Technology  
Sauermann, Jan, Stockholm University  
Saure, Denis, University of Pittsburgh  
Sautner, Zacharias, Frankfurt School of Finance & Management  
Sauvagnat, Julien, Bocconi University  
Savary, Jennifer, University of Arizona  
Savickas, Robert, George Washington University  
Savva, Nicos, London Business School  
Sayedi, Amin, University of Washington  
Saynisch, Philip, National Committee for Quality Assurance  
Scaillet, Olivier, University of Geneva  
Schaanning, Eric, European Systemic Risk Board  
Schaer, Oliver, University of Virginia  
Schepker, Donald, University of South Carolina  
Scherbina, Anna, Brandeis University  
Schildberg-Hörisch, Hannah, Düsseldorf Institute for Competition Economics  
Schiller, Christoph, Arizona State University  
Schipper, Burkhard, University of California, Davis  
Schivardi, Fabiano, Einaudi Institute for Economics and Finance  
Schlapp, Jochen, Frankfurt School of Finance & Management  
Schley, Dan, Erasmus University  
Schliephake, Eva, University of Bonn  
Schloetzer, Jason, Georgetown University  
Schmalz, Martin, University of Oxford  
Schmardebeck, Roy, University of Tennessee  
Schmeling, Maik, Goethe University Frankfurt  
Schmid, Markus, University of St. Gallen  
Schmid, Thomas, University of Hong Kong  
Schmidt, Breno, University of New South Wales  
Schmidt, Daniel, HEC Paris  
Schmidt, Ulrich, Kiel Institute for the World Economy  
Schmidt, William, Cornell University  
Schmitz, Patrick, Universität zu Köln  
Schneider, Andres, Federal Reserve Board

Schneider, Jon, Google Inc New York  
Schneider, Paul, University of Lugano  
Schneider, Sebastian, Max Planck Institut for Research on Collective Goods  
Schnitzlein, Charles, University of Vermont  
Schoenfeld, Jordan, Dartmouth College  
Schoenherr, David, Princeton University  
Schonger, Martin, ETH Zürich  
Schöttner, Anja, Humboldt University of Berlin  
Schrumpf, Andreas, Bank for International Settlements  
Schröder, Marina, Leibniz University Hannover  
Schroth, Enrique, EDHEC Business School  
Schudy, Simeon, LMU Munich  
Schuerhoff, Norman, University of Lausanne  
Schultz, Paul, University of Notre Dame  
Schulz, Jonathan, George Mason University  
Schumacher, David, McGill University  
Schumacher, Heiner, KU Leuven  
Schwaab, Bernd, European Central Bank  
Schwardmann, Peter, University of Munich  
Schwartz-Ziv, Miriam, Michigan State University  
Schweidel, David, Emory University  
Schwenkler, Gustavo, Santa Clara University  
Schwert, Michael, University of Pennsylvania  
Schwerter, Frederik, University of Cologne  
Scur, Daniela, Cornell University  
Seamans, Robert, New York University  
Seasholes, Mark, Arizona State University  
Seegmiller, Bryan, Massachusetts Institute of Technology  
Segal, Carmit, University of Zurich  
Segal, Gill, University of North Carolina at Chapel Hill  
Segev, Danny , University of Haifa  
Segura, Anatoli, Bank of Italy  
Seifert, Matthias, IE Business School  
Seiler, Stephan, University of California, Los Angeles  
Seiler, Thomas, Stockholm School of Economics  
Sekar, Shreyas, University of Toronto  
Selove, Matthew, Chapman University  
Selvi, Aras, Imperial College London  
Sen, Alper, Bilkent University  
Sen, Ananya, Carnegie Mellon University  
Sen, Rik, University of New South Wales  
Sengul, Metin, Boston College  
Sengupta, Arjun, Nanyang Technological University  
Senot, Claire, Tulane University  
Seo, Sang Byung, University of Houston  
Seref, Onur, Virginia Polytechnic Institute and State University  
Serena, Marco, Max Planck Institute for Tax Law and Public Finance  
Serfes, Konstantinos, Drexel University

Serfling, Matthew, University of Tennessee  
Serpa, Juan, McGill University  
Serra, Danila, Texas A&M University  
Serra-Garcia, Marta, University of California, San Diego  
Serrano, Carlos, Pompeu Fabra University  
Servaes, Henri, London Business School  
Servátka, Maroš, MGSME Experimental Economics Laboratory  
Sethuraman, Nagarajan, University of Kansas  
Seuken, Sven, University of Zurich  
Severino, Felipe, Dartmouth College  
Sevilir, Merih, Indiana University  
Sezer, Ovul, University of North Carolina at Chapel Hill  
Shaffer, Matthew, University of Southern California  
Shafieezadeh-Abadeh, Soroosh, École Polytechnique Federale de Lausanne  
Shah, Eric, Dartmouth-Hitchcock Health System  
Shah, Rachna, University of Minnesota  
Shahrokhi Tehrani, Shervin, University of Texas at Dallas  
Shaikh, Maha, London School of Economics and Political Science  
Shalvi, Shaul, University of Amsterdam  
Shamir, Noam, Tel Aviv University  
Shan, Zhe, Miami University  
Shang, Guangzhi, Florida State University  
Shang, Kevin, Duke University  
Shang, Weixin, Lingnan University  
Shankar, Ramesh, University of Connecticut  
Shapiro, Bradley, University of Chicago  
Shapiro, Joel, University of Oxford  
Shaposhnik, Yaron, University of Rochester  
Sharkey, Amanda, University of Chicago  
Sharma, Kartikey, Northwestern University  
Sharma, Luv, University of South Carolina  
Sharman, Raj, University at Buffalo-The State University of New York  
Sharot, Tali, University College London  
Shaver, J. Myles, University of Minnesota  
Shechter, Steven, University of British Columbia  
Sheen, Albert, University of Oregon  
Shelef, Orie, University of Utah  
Shelegia, Sandro, Pompeu Fabra University  
Shen, Jianfeng, University of New South Wales  
Shen, Lin, INSEAD  
Shen, Qiaowei, Peking University  
Shen, Siqian, University of Michigan  
Shen, Yao, Baruch College  
Sheneman, Amy, Ohio State University  
Sheng, Jinfei, University of California, Irvine  
Sheremeta, Roman, Case Western Reserve University  
Sherlund, Shane, Federal Reserve Board  
Sherman, Eliot, London Business School

Sherstyuk, Katerina, University of Hawaii  
Shi, Cong, University of Michigan  
Shi, Lanfei, University of Virginia  
Shi, Mengze, University of Toronto  
Shi, Michael, Arizona State University  
Shi, Peng, University of Southern California  
Shi, Pengyi, Purdue University  
Shi, Ruixia, University of San Diego  
Shi, Wei, University of Miami  
Shi, Xiaolin, Snapchat  
Shi, Yuan, Cornell University  
Shi, Zhan, Tsinghua University  
Shi, Zijun, Hong Kong University of Science and Technology  
Shigeoka, Hitoshi, Simon Fraser University  
Shin, Donghwa, Princeton University  
Shin, Donghyuk, Arizona State University  
Shin, Dongwook, Hong Kong University of Science and Technology  
Shin, Hyoduk, University of California, San Diego  
Shin, Jae Yong, Seoul National University  
Shin, Jiwoong, Yale University  
Shin, Sangwoo, SolBridge International School of Business  
Shin, Woochoel, University of Florida  
Shipilov, Andrew, INSEAD  
Shive, Sophie, University of Notre Dame  
Shivendu, Shivendu, University of South Florida  
Shkilko, Andriy, Wilfrid Laurier University  
Shore, Jesse, Boston University  
Shore, Stephen, Georgia State University  
Shorrer, Ran, Pennsylvania State University  
Shou, Biying, City University of Hong Kong  
Shpitser, Ilya, Johns Hopkins University  
Shriver, Scott, University of Colorado Boulder  
Shroff, Nemit, Massachusetts Institute of Technology  
Shtern, Shimrit, Technion Israel Institute of Technology  
Shu, Susan, Boston College  
Shu, Suzanne, University of California, Los Angeles  
Shu, Tao, Chinese University of Hong Kong  
Shum, Stephen, City University of Hong Kong  
Shunko, Masha, University of Washington  
Shurchkov, Olga, Wellesley College  
Sialm, Clemens, University of Texas at Austin  
Sibilkov, Valeriy, University of Wisconsin-Milwaukee  
Siddiq, Auyon, University of California, Los Angeles  
Siegloch, Sebastian, University of Mannheim  
Siemroth, Christoph, University of Essex  
Sikochi, Anywhere, Harvard University  
Silberholz, John, University of Michigan  
Silva, Rui, New University of Lisbon

Silverman, Brian, University of Toronto  
Simin, Timothy, Pennsylvania State University  
Simintzi, Elena, University of North Carolina at Chapel Hill  
Simmons, Joseph, University of Pennsylvania  
Simon, Jay, American University  
Simonov, Andrey, Columbia University  
Simsek, A. Serdar, University of Texas at Dallas  
Simutin, Mikhail, University of Toronto  
Sing, Tien Foo, National University of Singapore  
Singer, Zvi, École des Hautes Etudes Commerciales  
Singh, Harpreet, University of Texas at Dallas  
Singh, Manpreet, Georgia Institute of Technology  
Singh, Shubhranshu, Johns Hopkins University  
Singh, Siddharth Prakash, University College London  
Singha, Sumanta, Indian School of Business  
Singhvi, Divya, Massachusetts Institute of Technology  
Sinha, Amitabh, Amazon  
Sinha, Ashish, University of Technology Sydney  
Sinnl, Markus, University of Vienna  
Siponen, Mikko, University of Jyväskylä  
Siriwardane, Emil, Harvard Business School  
Sivaramakrishnan, Shiva, Rice University  
Skeie, David, University of Warwick  
Skinner, Nikki, University of Georgia  
Skiti, Tedi, Temple University  
Skrastins, Janis, Washington University in St Louis  
Sletten, Ewa, Boston College  
Slivko, Olga, Centre for European Economic Research  
Sloan, Richard, University of Southern California  
Sloof, Randolph, University of Amsterdam  
Slutzky, Pablo, University of Maryland  
Smeets, Paul, Maastricht University  
Smerdon, David, University of Queensland  
Smith, Alec, Virginia Polytechnic Institute and State University  
Smith, Andrew, Appalachian State University  
Smith, Aron, University of California, Davis  
Smith, Howard, University of Oxford  
Smith, Kevin, Stanford University  
Snyder, Jason, University of Utah  
Sobel, Matthew, Case Western Reserve University  
Soberman, David, University of Toronto  
Sockin, Michael, University of Texas at Austin  
Söderlind, Paul, University of St. Gallen  
Sojli, Elvira, University of New South Wales  
Sojourner, Aaron, University of Minnesota  
Sokol, Daniel, University of Florida  
Sokolov, Konstantin, University of Memphis  
Soll, Jack, Duke University

Solomon, David, Boston College  
Soltani, Mohamad, University of Alberta  
Soltes, Eugene, Harvard Business School  
Soman, Dilip, University of Toronto  
Somanchi, Sriram, University of Notre Dame  
Sommer, Svenja, HEC Paris  
Son, Yoonseock, University of Notre Dame  
Song, Changcheng, Singapore Management University  
Song, DongHo, Johns Hopkins University  
Song, Hummy, University of Pennsylvania  
Song, Yang, University of Washington  
Song, Yicheng, University of Minnesota  
Song, Zhaogang, Johns Hopkins University  
Sonmez, Erkut, University of Nebraska-Lincoln  
Sonnemans, Joep, University of Amsterdam  
Sood, Ashish, University of California, Riverside  
Sorensen, Peter, University of Copenhagen  
Sosa, M. Lourdes, CUNY, Vicente  
Sosa, Manuel, INSEAD  
Spaenjers, Christophe, HEC Paris  
Spagnolo, Giancarlo, SITE Stockholm School of Economics  
Spantig, Lisa, University of Essex  
Spiess, Jann, Stanford University  
Spiliotopoulou, Eirini, Tilburg University  
Spiller, Stephen, University of California, Los Angeles  
Spina, Chiara, Bocconi University  
Spray, John, International Monetary Fund  
Springel, Katalin, Georgetown University  
Sraer, David, University of California, Berkeley  
Sridharan, Swaminathan, Northwestern University  
Srinidhi, Bin, University of Texas at Arlington  
Srinivasan, Raji, University of Texas at Austin  
Sriram, S., University of Michigan  
Srivastava, Anup, Haskayne School of Business University of Calgary  
Srivastava, Joydeep, Temple University  
Stahl, Florian, University of Mannheim  
Staino, Alessandro, University of Calabria  
Stam, D.A., Erasmus University  
Stamatopoulos, Ioannis, University of Texas at Austin  
Stanton, Christopher, University of Utah  
Starmans, Jan, Stockholm School of Economics  
Starr, Evan, University of Maryland, College Park  
Stathopoulos, Andreas, University of North Carolina at Chapel Hill  
Stavins, Joanna, Federal Reserve Bank of Boston  
Stecher, Jack, University of Alberta  
Steele, Dayton, University of North Carolina at Chapel Hill  
Stefan, Matthias, Innsbruck University  
Stefanescu, Irina, Federal Reserve Board

Steffel, Mary, Northeastern University  
Steffen, Thomas, Yale University  
Steimle, Lauren, University of Michigan  
Steinhardt, Claudius, Bundeswehr University Munich  
Steri, Roberto, University of Luxembourg  
Stern, Lea, University of Washington  
Stevens, Luminita, University of Maryland, College Park  
Stewart, Neil, University of Warwick  
Stice-Lawrence, Lorien, University of Southern California  
Stikeleather, Bryan, University of South Carolina  
Stock, Axel, University of Central Florida  
Stolper, Oscar, University of Marburg  
Stoumbos, Robert, Columbia University  
Stouraitis, Aristotelis, Hong Kong Baptist University  
Stouras, Konstantinos, University College Dublin  
Stovall, John E, Brigham Young University  
Stowasser, Till, University of Stirling  
Strobl, Günter, Frankfurt School of Finance & Management  
Stroube, Bryan, London Business School  
Strub, Moris, Chinese University of Hong Kong  
Struben, Jeroen, Emlyon Business School  
Strulov-Shlain, Avner, University of Chicago  
Stuart, Colleen, Johns Hopkins University  
Stubben, Stephen, University of Utah  
Stueber, Robert, WZB Berlin Social Science Center  
Sturgess, Jason, Queen Mary University of London  
Sturt, Bradley, Massachusetts Institute of Technology  
Su, Yanan, Johns Hopkins University  
Suarez Serrato, Juan Carlos, Duke University  
Subasi, Musa, University of Maryland, College Park  
Subramanian, Ajay, Georgia State University  
Subramanian, Ravi, Georgia Institute of Technology  
Subramanian, Upender, University of Texas at Dallas  
Subramanyam, Ramanath, University of Illinois at Urbana-Champaign  
Sulaeman, Johan, National University of Singapore  
Sullivan, Colin, Stanford University  
Sulz, Sandra, Erasmus University  
Sumida, Mika, Cornell Tech  
Sun, Andy, Georgia Institute of Technology  
Sun, Chen, Humboldt University of Berlin  
Sun, Estelle, Boston University  
Sun, Jiankun, Imperial College London  
Sun, Monic, Boston University  
Sun, Peng, Duke University  
Sun, Shujing, University of Texas at Dallas  
Sun, Tianshu, University of Southern California  
Sun, Wei, IBM Thomas J Watson Research Center  
Sun, Zhen, George Washington University

Sunada, Takeaki, University of Rochester  
Sunar, Nur, University of North Carolina at Chapel Hill  
Sundaresan, Savitar, Imperial College London  
Sunde, Uwe, University of Munich  
Sunder, Jayanthi, University of Arizona  
Sunder, Shyam, University of Arizona  
Susarla, Anjana, Michigan State University  
Suslava, Kate, Bucknell University  
Sussman, Abigail, University of Chicago  
Sutherland, Andrew, Massachusetts Institute of Technology  
Swaminathan, Anand, Emory University  
Swinney, Robert, Duke University  
Sydnor, Justin, University of Wisconsin  
Symeonidis, George, University of Essex  
Szech, Nora, Karlsruhe Institute of Technology  
Szydlowski, Martin, University of Minnesota  
Tabellini, Guido, Bocconi University  
Tafti, Ali, University of Illinois at Chicago  
Tag, Joacim, Research Institute of Industrial Economics, Sweden  
Tahbaz-Salehi, Alireza, Northwestern University  
Tahoun, Ahmed, London Business School  
Tai, Mingzhu, University of Hong Kong  
Taillard, Jerome, Babson College  
Tallon, Jean-Marc, École d'économie de Paris  
Tamayo, Jorge, Harvard Business School  
Tambe, Prasanna, University of Pennsylvania  
Tamir, Tami, Interdisciplinary Center Herzliya  
Tamoni, Andrea, Rutgers University  
Tan, Chuan-Hoo, National University of Singapore  
Tan, David, University of Washington  
Tan, Poh Lin, Lee Kuan Yew School of Public Policy  
Tan, Tom, Southern Methodist University  
Tan, Weiqiang, Hong Kong Baptist University  
Tan, Yinliang, Tulane University  
Tandon, Vivek, National University of Singapore  
Taneri, Niyazi, National University of Singapore  
Tang, Dragon, University of Hong Kong  
Tang, Huan, HEC Paris  
Tang, Ke, Tsinghua University  
Tang, Michael, New York University  
Tang, Qihe, University of New South Wales  
Tang, Sammi, University of Miami  
Tang, Vicki Wei, Georgetown University  
Tang, Wenjie, National University of Singapore  
Tang, Xiaoxiao, University of Texas at Dallas  
Tang, Yi, Fordham University  
Tang, Yuehua, University of Florida  
Tankov, Peter, ENSAE ParisTech

Tannenbaum, David, University of Utah  
Tanrisever, Fehmi, Bilkent University  
Tantri, Prasanna, Indian School of Business  
Tarakci, Murat, Erasmus University  
Tarantino, Emanuele, University of Mannheim  
Tasoff, Joshua, Claremont Graduate University  
Tasselli, Stefano, Erasmus University  
Tate, Geoff, University of Maryland, College Park  
Taubinsky, Dmitry, Harvard University  
Taussig, Markus, Rutgers University  
Tavoni, Massimo, Politecnico di Milano  
Tay, Timothy, Massachusetts Institute of Technology  
Taylor, Daniel, University of Pennsylvania  
Taylor, Greg, University of Oxford  
Taylor, Lucian, University of Pennsylvania  
Taylor, Sean, Facebook  
Tchisty, Alexei, University of Illinois at Urbana-Champaign  
Tédongap, Roméo, ESSEC Business School  
Telea, Alexandru, Utrecht University  
Tenorio, Rafael A., DePaul University  
Teo, Melvyn, Singapore Management University  
Teodoridis, Florenta, University of Southern California  
Teoh, Siew Hong, University of California, Irvine  
ter Wal, Anne, Imperial College London  
Tereick, Benjamin, Erasmus University  
Tereyagoglu, Necati, University of South Carolina  
Tergiman, Chloe, New York University  
Tervio, Marko, Aalto University  
Testoni, Marco, Tilburg University  
Tezcan, Tolga, London Business School  
Thakral, Neil, Brown University  
Tham, Wing, University of New South Wales  
Thanassoulis, John, University of Warwick  
Thevaranjan, Alex, Syracuse University  
Thijssen, Jacco, University of York  
Thoeni, Christian, University of Lausanne  
Thomadsen, Raphael, Washington University in St. Louis  
Thomas, Catherine, London School of Economics and Political Science  
Thomas, Douglas, Pennsylvania State University  
Thomas, Shawn, University of Pittsburgh  
Thompson, Peter, Emory University  
Thomson, William, University of Rochester  
Thorburn, Karin, Norwegian School of Economics  
Thornock, Jake, Brigham Young University  
Tian, Xiaoli, Georgetown University  
Tian, Xu, University of Toronto  
Tian, Xuan, Indiana University  
Tilcsik, Andras, University of Toronto

Timoshenko, Artem, Massachusetts Institute of Technology  
Tinn, Katrin, Imperial College London  
Tinsley, Catherine, Georgetown University  
Tirunillai, Seshadri, University of Houston  
Tiu, Cristian, University at Buffalo-The State University of New York  
Tiwari, Ashish, University of Iowa  
Tiwari, Vikram, Vanderbilt University Medical Center  
Toda, Alexis, University of California, San Diego  
Todri, Vilma, Emory University  
Toh, Ying Lei, Federal Reserve Bank of Kansas City  
Tolbert, Pam, Cornell University  
Toma, Mattie, Harvard University  
Tomy, Rimmy, University of Chicago  
Tong, Jordan, University of Wisconsin-Madison  
Tong, Shilu, Chinese University of Hong Kong  
Tongarlak, Mustafa, Bogazici University  
Topaloglu, Huseyin, Cornell University  
Topaloglu, Selim, Queen's University  
Torgler, Benno, Queen's University  
Toriello, Alejandro, Georgia Institute of Technology  
Torrice, Alfredo, Polytechnique Montreal  
Tortoriello, Marco, Bocconi University  
Toulis, Panagiotis, University of Chicago  
Toussaert, Séverine, University of Oxford  
Townsend, Richard, University of California, San Diego  
Toxvaerd, Flavio, University of Cambridge  
Toyasaki, Fuminori, York University  
Trapp, Andrew, Worcester Polytechnic Institute  
Trautmann, Stefan, Heidelberg University  
Tremblay, Mark, Miami University  
Trevino, Isabel, University of California, San Diego  
Trichakis, Nikolaos, Massachusetts Institute of Technology  
Trigilia, Giulio, University of Rochester  
Tripathi, Muktak, Temple University  
Trivella, Alessio, ETH Zürich  
Trojani, Fabio, University of Geneva  
Trudeau, Christian, University of Windsor  
Trueblood, Jennifer, Vanderbilt University  
Truong, Van Anh, Columbia University  
Truong, Van-Anh, Columbia University  
Tsai, Claire, University of Toronto  
Tsai, Tiffany, National University of Singapore  
Tsang, Albert, Hong Kong Polytechnic University  
Tschischek, Sebastian, Microsoft Research Cambridge  
Tseng, Ayung, Indiana University Bloomington  
Tserlukevich, Yuri, Arizona State University  
Tsoukalas, Gerry, University of Pennsylvania  
Tsoy, Anton, University of Toronto

Tsui, David, University of Southern California  
Tsyplakov, Sergey, University of South Carolina  
Tuchman, Anna, Northwestern University  
Tucker, Jennifer, University of Florida  
Tufano, Fabio, University of Nottingham  
Tukiainen, Janne, Government Institute for Economic Research  
Tulabandhula, Theja, University of Illinois at Urbana-Champaign  
Tuli, Kapil, Singapore Management University  
Tully, Stephanie, Stanford University  
Tumlinson, Justin, Loughborough University  
Tunc, Sait, Virginia Polytechnic Institute and State University  
Turcic, Danko, University of California, Riverside  
Turhan, Bertan, Iowa State University  
Turkoglu, Aykut, Boston University  
Turner, John, University of California, Irvine  
Tusar, Tea, Jozef Stefan Insitute  
Tut, Daniel, Ryerson University  
Tverdostup, Maryna, University of Innsbruck  
Twedt, Brady, Indiana University  
Tyagi, Rajeev, University of California, Irvine  
Tzabbar, Daniel, Drexel University  
Tzeng, Larry, National Taiwan University  
Udenio, Maximiliano, Eindhoven University of Technology  
Udwani, Rajan, University of California, Berkeley  
Uetake, Kosuke, Yale University  
Ugander, Johan, Stanford University  
Uichanco, Joline, University of Michigan  
Uler, Neslihan, University of Michigan  
Ulu, Canan, Georgetown University  
Ungeheuer, Michael, Aalto University  
Ungemach, Christoph, Technische Universität München  
Unver, Utku, Boston College  
Uppari, Bhavani Shanker, Singapore Management University  
Urban, Daniel, Erasmus University  
Urcan, Oktay, University of Illinois at Urbana-Champaign  
Urminsky, Oleg, University of Chicago  
Ursu, Raluca, New York University  
Urzua, Sergio, University of Maryland, College Park  
Ushchev, Philipp, HSE University  
Uysal, Vahap, DePaul University  
Uzzi, Brian, Northwestern University  
Vakili, Keyvan, London Business School  
Vakratsas, Demetrios, McGill University  
Valacich, Joseph, University of Arizona  
Valdes, Leon, University of Pittsburgh  
Valentini, Giovanni, University of Navarra  
Valogianni, Konstantina, IE Business School  
Valta, Philip, University of Bern

Vamosy, Domonkos, University of Pittsburgh  
Van Aaken, Dominik, University of Salzburg  
Van Binsbergen, Jules, University of Pennsylvania  
van Bruggen, Paul, Tilburg University  
Van de Brake, Hendrik, University of Groningen  
van de Kuilen, Gijs, Erasmus University  
van de Rijt, Arnout, Utrecht University  
Van den Steen, Eric, Harvard Business School  
van der Weele, Joel, University of Amsterdam  
van Dijk, Mathijs, Erasmus University  
Van Gunten, Tod, University of Edinburgh  
van Kervel, Vincent, Vrije Universiteit  
van Lelyveld, Iman, Vrije Universiteit  
Van Parys, Bart, Massachusetts Institute of Technology  
Van Parys, Jessica , Hunter College, CUNY  
Van Quaquebeke, Niels, Kühne Logistics University  
van Veldhuizen, Roel, WZB Berlin Social Science Center  
Van Wesep, Edward, University of Colorado  
Vance, Anthony, Temple University  
Vanneste, Bart, University College London  
Vardi, Shai, Purdue University  
Vardoulakis, Alex, Federal Reserve Board  
Vashevko, Anthony, Stanford University  
Vashishtha, Rahul, Duke University  
Vasios, Michalis, Bank of England  
Vayanos, Phebe, University of Southern California  
Vaze, Vikrant, Dartmouth College  
Vedantam, Aditya, University at Buffalo-The State University of New York  
Veenman, David, Amsterdam Business School  
Velikov, Mihail, Pennsylvania State University  
Venkataraman, Ashwin, University of Texas at Dallas  
Venkataraman, Sriram, University of South Carolina  
Venkateswaran, Venky, New York University  
Vera, Jorge, Pontifical Catholic University of Chile  
Veraart, Luitgard, London School of Economics and Political Science  
Verani, Stephane, Federal Reserve Board  
Verardo, Michela, London School of Economics and Political Science  
Vergne, Jean-Philippe, Ivey Business School  
Vergopoulos, Vassili, Paris School of Economics  
Verhaal, J., Tulane University  
Verhoeven, Dennis, KU Leuven  
Verrina, Eugenio, Max Planck Institut for Research on Collective Goods  
Vespa, Emanuel, University of California, Santa Barbara  
Vestman, Roine, Stockholm University  
Vickery, James, Federal Reserve Bank of New York  
Vieider, Ferdinand, University of Reading  
Vielma, Juan Pablo, Massachusetts Institute of Technology  
Vieyra, Matias , Bank of Canada

Vilkov, Grigory, Frankfurt School of Finance & Management  
Villamil, Anne, University of Iowa  
Villeneuve, Stephane, Toulouse School of Economics  
Villeva, Marie-Claire, French National Centre for Scientific Research  
Virag, Gabor, University of Toronto  
Visser, Bauke, Erasmus University  
Viswanathan, Siva, University of Maryland, College Park  
Vitorino, Maria Ana, INSEAD  
Vladimirov, Vladimir, University of Amsterdam  
Vohra, Rakesh, University of Pennsylvania  
Vojnovic, Milan, London School of Economics and Political Science  
Volpin, Paolo, Cass Business School  
von Gaudecker, Hans-Martin, University of Bonn  
von Helversen, Bettina, University of Bremen  
von Siemens, Ferdinand, University of Frankfurt  
Vosgerau, Joachim, Bocconi University  
Vossen, Thomas, University of Colorado  
Vuilleme, Guillaume, HEC Paris  
Vyas, Dushyantkumar, University of Toronto  
Wager, Stefan, Stanford University  
Waggoner, Bo, University of Colorado Boulder  
Wagner, Alexander, University of Zurich  
Wagner, Christian, Copenhagen Business School  
Wagner, Hannes, Bocconi University  
Wagner, Laura, Universidade Católica Portuguesa  
Wagner, Michael, University of Washington  
Wagner, Stefan, ESMT Berlin  
Wagner, Wolf, Tilburg University  
Waguespack, David, University of Maryland  
Waibel, Christian, Eidgenössische Technische Hochschule Zurich  
Waiser, Robert, London Business School  
Wakker, Peter, Erasmus University  
Walasek, Lukasz, University of Warwick  
Walden, Eric, Texas Tech University  
Waldman, Michael, Cornell University  
Walker, Dylan, Boston University  
Walker, Jesse, Ohio State University  
Walker, Matthew, Durham University  
Wallen, Jonathan, Harvard Business School  
Walteros, Jose, University at Buffalo-The State University of New York  
Walther, Ansgar, Imperial College London  
Walzl, Markus, Innsbruck University  
Wan, Xiangwei, Shanghai Jiao Tong University  
Wan, Zhixi, University of Hong Kong  
Wang, Albert, Auburn University  
Wang, Baolian, University of Florida  
Wang, Chao, University of Pennsylvania  
Wang, Charles, Harvard Business School

Wang, Clare, University of Colorado Boulder  
Wang, Dashun, Northwestern University  
Wang, Dechun, Texas A&M University  
Wang, Gang, Florida State University  
Wang, Guihua, University of Texas at Dallas  
Wang, Hai, Singapore Management University  
Wang, He, Georgia Institute of Technology  
Wang, Hongchang, University of Texas at Dallas  
Wang, Jessie Jiayu, Arizona State University  
Wang, Jian, Leiden University  
Wang, Jing, Hong Kong University of Science and Technology  
Wang, Jingguo, University of Texas at Arlington  
Wang, Jingqi, University of Hong Kong  
Wang, Kangkang, Washington University in St. Louis  
Wang, Laura, University of Illinois at Urbana-Champaign  
Wang, Lizhi, Iowa State University  
Wang, Long, City University of Hong Kong  
Wang, Olivier, New York University  
Wang, Pengfei, BI Norwegian Business School  
Wang, Qi, China Europe International Business School  
Wang, Qin, Oklahoma State University  
Wang, Qiong, University of Illinois  
Wang, Rebecca, Lehigh University  
Wang, Richard, Babson College  
Wang, Rong, Singapore Management University  
Wang, Ruodu, University of Waterloo  
Wang, Ruxian, Johns Hopkins University  
Wang, Shouqiang, University of Texas at Dallas  
Wang, Shuting, Baruch College  
Wang, Siyu, Missouri State University  
Wang, Tan, Shanghai Jiao Tong University  
Wang, Tianyang, Colorado State University  
Wang, Tianyu, Tsinghua University  
Wang, Tracy, University of Minnesota  
Wang, Wei, Queen's University  
Wang, Weiguang, University of Rochester  
Wang, Wenbin, Shanghai University of Finance and Economics  
Wang, Wenbo, Hong Kong University of Science and Technology  
Wang, Wenyu, Indiana University  
Wang, Xiaojun, University of Bristol  
Wang, Xiaolu, Iowa State University  
Wang, Xin, Hong Kong University of Science and Technology  
Wang, Xinfang (Jocelyn), Georgia Southern University  
Wang, Xinxin, University of North Carolina at Chapel Hill  
Wang, Xuan, Hong Kong University of Science and Technology  
Wang, Xue, Ohio State University  
Wang, Yajun, Baruch College  
Wang, Yanbo, National University of Singapore

Wang, Yanwen, University of British Columbia  
Wang, Yingfei, University of Washington  
Wang, Yining, University of Florida  
Wang, Yixin Iris, University of Illinois at Urbana-Champaign  
Wang, Yongxiang, University of Southern California  
Wang, Yu, California State University, Long Beach  
Wang, Yulan, Hong Kong Polytechnic University  
Wang, Yunjie, Renmin University of China  
Wang, Zheng, City University of Hong Kong  
Wang, Zhiwen, National University of Singapore  
Wang, Zhu, Federal Reserve Bank of Kansas City  
Wang, Zizhuo, Chinese University of Hong Kong  
Wangerin, Daniel, Michigan State University  
Want, Bin, University of Texas at Rio Grande Valley  
Warachka, Mitch, Chapman University  
Warnick, Benjamin, Washington State University Vancouver  
Waseem, Mazhar, University of Manchester  
Wason, James, MRC Biostatistics Unit  
Watanabe, Masahiro, University of Alberta  
Watkins, Jessica, University of Notre Dame  
Watson, Jeremy, University of Minnesota  
Wattal, Sunil, Temple University  
Watts, Edward, Yale University  
Waytz, Adam, Northwestern University  
Weagley, Daniel, Georgia Institute of Technology  
Webb, Ryan, University of Toronto  
Weber, Bruce, London Business School  
Weber, David, University of Connecticut  
Weber, Marko, Columbia University  
Weber, Matthias, University of Saint Gallen  
Weber, Michael, University of Chicago  
Weber, Stefan, Leibniz University Hannover  
Wehrheim, David, IESE Business School  
Wehrly, Eric, Western Washington University  
Wei, Kelsey, University of Texas at Dallas  
Wei, Lai, Lingnan University  
Wei, Mike, University at Buffalo-The State University of New York  
Wei, Yanhao, University of Southern California  
Wei, Yehua, Duke University  
Wei, Zaiyan, Purdue University  
Weigelt, Carmen, Tulane University  
Weigert, Florian, University of Neuchâtel  
Weinberg, Matthew, Drexel University  
Weinstein, Russell, University of Illinois at Urbana-Champaign  
Weisbenner, Scott, University of Illinois at Urbana-Champaign  
Weisbrod, Eric, University of Miami  
Welch, Kyle, George Washington University  
Wen, Quan, Georgetown University

Wen, Wen, University of Texas at Austin  
Weng, Xi, Peking University  
Wenner, Lukas, Universitat zu Koln  
Werner, Peter, Maastricht University  
Werner, Timothy, University of Texas at Austin  
Westermann, Ramona, Copenhagen Business School  
Whelan, Paul, Imperial College London  
Whinston, Andrew, University of Texas at Austin  
White, Alexander, Tsinghua University  
White, Brian, University of Texas at Austin  
White, Roger, Arizona State University  
Wibbens, Phebo, INSEAD  
Wibral, Matthias, University of Bonn  
Wichman, Casey, Georgia Institute of Technology  
Wiersema, Margarethe, University of California, Irvine  
Wiesemann, Wolfram , Imperial College London  
Wiesen, Daniel, University of Cologne  
Wilbur, Kenneth, University of California, San Diego  
Wildenbeest, Matthijs, Indiana University  
Wilkening, Tom, University of Melbourne  
Williams, Braden, University of Texas at Austin  
Williams, Brian, Indiana University Bloomington  
Williams, Christopher, University of Michigan  
Williams, Elanor, Washington University in St Louis  
Williams, Jared, University of South Florida  
Williams, Kevin, Yale University  
Wilson, Chris, Loughborough University  
Wilson, Daniel J , Federal Reserve Bank San Francisco  
Wilson, James, North Carolina State University  
Wilson, Nathan, Federal Trade Commission  
Wilson, Ryan, University of Oregon  
Winn, Abel, Chapman University  
Winter, Ralph, University of British Columbia  
Witkowski, Jens, Frankfurt School of Finance & Management  
Woehler, Meredith, Portland State University  
Woepfel, Michael, Purdue University  
Wohl, Avi, Tel Aviv University  
Wollmann, Thomas, University of Chicago  
Won, Shinjae, University of Illinois at Urbana-Champaign  
Wong, M.H. Franco, University of Toronto  
Wong, Maisy, University of Pennsylvania  
Wong, Yu Ting Forester, University of Southern California  
Woodward, Kyle, University of North Carolina at Chapel Hill  
Woolley, Kaitlin, Cornell University  
Wooten, Joel, University of South Carolina  
Workiewicz, Maciej, ESSEC Business School  
Wowak, Kaitlin, University of Notre Dame  
Wright, Julian, National University of Singapore

Wright, Ryan, University of Virginia  
Wu, Biyu, University of Nebraska-Lincoln  
Wu, Chenguang (Allen), Hong Kong University of Science and Technology  
Wu, Di, University of Michigan  
Wu, Donghui, Chinese University of Hong Kong  
Wu, Eugenia, University of Pittsburgh  
Wu, George, University of Chicago  
Wu, Hong , Fudan University  
Wu, Jiahua, Imperial College London  
Wu, Jing, Chinese University of Hong Kong  
Wu, Julie, University of Nebraska-Lincoln  
Wu, Liuren, Baruch College  
Wu, Lynn, University of Pennsylvania  
Wu, Owen, Indiana University Bloomington  
Wu, Qi, Case Western Reserve University  
Wu, Qinxi, Baylor University  
Wu, Sherry, University of California, Los Angeles  
Wu, Wei, Texas A&M University  
Wu, Xi, Central University of Finance and Economics  
Wu, Xi, University of California, Berkeley  
Wu, Xiaole, Fudan University  
Wu, Yanhui, University of Southern California  
Wu, Yaozhong, National University of Singapore  
Wu, Youchang, University of Oregon  
Wu, Yue, University of Pittsburgh  
Wu, Yufeng, University of Illinois at Urbana-Champaign  
Wu, Zhengping, Singapore Management University  
Wuchty, Stefan, University of Miami  
Xefteteris, Dimitrios, University of Cyprus  
Xia, Han, University of Texas at Dallas  
Xia, Jun, University of Texas at Dallas  
Xiang, Yi, China Europe International Business School  
Xiao, Erte, Monash University  
Xiao, Kairong, Columbia University  
Xiao, Li, University of California, Berkeley  
Xiao, Mo, University of Arizona  
Xiao, Ruli, Indiana University  
Xiao, Steven, University of Texas at Dallas  
Xiao, Wenqiang, New York University  
Xiaolin, Li, London School of Economics and Political Science  
Xie, Chloe, Stanford University  
Xie, Fei, University of Delaware  
Xie, Huan, Concordia University  
Xie, Jin, Chinese University of Hong Kong  
Xie, Wei, Northeastern University  
Xie, Weijun, Virginia Polytechnic Institute and State University  
Xin, Linwei, University of Chicago  
Xin, Mingdi, University of California, Irvine

Xing, Hao, Boston University  
Xing, Yuhang, Rice University  
Xiong, Ruoxuan, Stanford University  
Xiong, Siyang, University of California, Riverside  
Xiong, Yan, Hong Kong University of Science and Technology  
Xiu, Dacheng, University of Chicago  
Xu, Fasheng, Syracuse University  
Xu, Haifeng, University of Virginia  
Xu, Heng, American University  
Xu, Hong, Hong Kong University of Science and Technology  
Xu, Huan, National University of Singapore  
Xu, Huifu, University of Southampton  
Xu, Jin, Virginia Polytechnic Institute and State University  
Xu, Joseph, Carnegie Mellon University  
Xu, Keli, Indiana University  
Xu, Lai, Syracuse University  
Xu, Lizhen, Georgia Institute of Technology  
Xu, Nancy, Boston College  
Xu, Renyuan, University of Oxford  
Xu, Ting, University of Virginia  
Xu, Wenxin, Hong Kong Polytechnic University  
Xu, Yan, University of Hong Kong  
Xu, Yi, University of Maryland  
Xu, Yilong, University of Heidelberg  
Xu, Yuqian, University of Illinois at Urbana-Champaign  
Xu, Zhaoxia, University of New South Wales  
Xu, Zibin, University of Southern California  
Xu, Zuo Quan, Hong Kong Polytechnic University  
Xue, Chen, University of Cincinnati  
Xue, Hao, Duke University  
Xue, Jingyi, Singapore Management University  
Xue, Ling, Georgia State University  
Xue, Wenjie, National University of Singapore  
Yachang, Zeng, Nanyang Technological University  
Yahav, Inbal, Tel Aviv University  
Yan, Chiwei, Massachusetts Institute of Technology  
Yan, Hongjun, DePaul University  
Yan, Jubo, Nanyang Technological University  
Yan, Lu (Lucy), Indiana University  
Yan, Shipeng, City University of Hong Kong  
Yan, Zhenzhen, Nanyang Technological University  
Yang, Baozhong, Georgia State University  
Yang, Bicheng, University of British Columbia  
Yang, Botao, University of Southern California  
Yang, Chaolin, Shanghai University of Finance and Economics  
Yang, Chen, Chinese University of Hong Kong  
Yang, Chenyu, University of Maryland, College Park  
Yang, Dan, University of Hong Kong

Yang, Daojiang, Tianjin University  
Yang, Endong, University of Macau  
Yang, Holly, Singapore Management University  
Yang, Jingni, Australian National University  
Yang, Jun, Indiana University  
Yang, Jun, University of Notre Dame  
Yang, Kai Hao, Yale University  
Yang, Liu, Tsinghua University  
Yang, Liu, University of Maryland  
Yang, Lusi, University of Arizona  
Yang, Luyi, University of California, Berkeley  
Yang, Ming, Duke University  
Yang, Mingwen, University of Washington  
Yang, Mochen, University of Minnesota  
Yang, Mu-Jeung, University of Utah  
Yang, Nan, Hong Kong Polytechnic University  
Yang, Nan, National University of Singapore  
Yang, Nathan, Cornell University  
Yang, Ruke, Imperial College London  
Yang, S. Alex, London Business School  
Yang, Tiantian , University of Pennsylvania  
Yang, Wei, George Mason University  
Yang, Yang, University of Florida  
Yang, Yanhua Sunny, University of Connecticut  
Yang, Yi, Zhejiang University  
Yang, Yong, Chinese University of Hong Kong  
Yang, Youwei, Cornell University  
Yang, Zhibin (Ben), University of Oregon  
Yang, Zoe, Chinese University of Hong Kong  
Yannelis, Constantine, University of Chicago  
Yao, Chen, Chinese University of Hong Kong  
Yao, Dennis, Harvard Business School  
Yao, Song, Washington University in St Louis  
Yao, Yuliang, Lehigh University  
Yaouanq, Yves, Ludwig-Maximilians-University Munich  
Yapar, Ozge, Indiana University Bloomington  
Yawson, Alfred, University of Adelaide  
Ye, Irene, University of Toronto  
Ye, Shun, George Mason University  
Ye, Xuan, Boston College  
Ye, Ye, Stanford University  
Yehezkel, Yaron, Tel-Aviv University  
Yenmez, Bumin , Boston College  
Yeo, Lisa, University of California, Merced  
Yeung, Catherine, Chinese University of Hong Kong  
Yeung, Eric, Cornell University  
Yezege, Ari, Bentley University  
Yildirim, Pinar, University of Pennsylvania

Yildiz, Ozlem, University of Virginia  
Yim, Andrew, Cass Business School  
Yin, Dezhi, University of South Florida  
Yin, Pai-Ling, University of Southern California  
Yin, Qianbo, Shanghai University of Finance and Economics  
Yoganarasimhan, Hema, University of Washington  
Yom-Tov, Galit, Technion Israel Institute of Technology  
Yonder, Erkan, Concordia University  
Yoo, Onesun, University College London  
Yoo, Woongsun, Central Michigan University  
Yoogalingam, Reena, Brock University  
Yoon, Aaron, Northwestern University  
Yoon, Dae-Hee, Yonsei University  
Yost, Benjamin, Massachusetts Institute of Technology  
Young, Mark, University of Southern California  
Younkin, Peter, University of Oregon  
Ytsma, Erina, Carnegie Mellon University  
Yu, Christina , Cornell University  
Yu, Fan, Claremont McKenna College  
Yu, Frank, China Europe International Business School  
Yu, Gwen, University of Michigan  
Yu, Jianfeng, Tsinghua University  
Yu, Jungju, City University of Hong Kong  
Yu, Man, Hong Kong University of Science and Technology  
Yu, Qianqian, Lehigh University  
Yu, Qiuping, Georgia Institute of Technology  
Yu, Sandy, University of Minnesota  
Yu, Siyu, New York University  
Yu, Yimin, City University of Hong Kong  
Yu, Yong, University of Texas at Austin  
Yu, Yugang, University of Science and Technology of China  
Yuan, Kathy, London School of Economics and Political Science  
Yuan, Ren, National University of Singapore  
Yuan, Rong, Stitch Fix  
Yucel, Safak, Georgetown University  
Yueshen, Bart, INSEAD  
Yun, Hayong, Michigan State University  
Zach, Tzachi , Ohio State University  
Zacharias, Christos, University of Miami  
Zahra, Shaker, University of Minnesota  
Zakolyukina, Anastasia, University of Chicago  
Zaldokas, Alminas, Hong Kong University of Science and Technology  
Zang, Amy, Hong Kong University of Science and Technology  
Zank, Horst, University of Manchester  
Zantedeschi, Daniel, University of South Florida  
Zapatero, Fernando, University of Southern California  
Zapechelnyuk, Andriy (Andy) , University of St. Andrews  
Zarate, Roman, Institute on Behavior & Inequality

Zavyalova, Anastasiya, Rice University  
Zednik, Anita, Vienna University of Economics and Business  
Zehnder, Christian, University of Lausanne  
Zein, Jason, University of New South Wales  
Zeithammer, Robert, University of California, Los Angeles  
Zeleznikow, John , La Trobe University  
Zeltzer, Dan, Tel Aviv University  
Zeng, Yao, University of Washington  
Zervas, Georgios, Boston University  
Zetlin-Jones, Ariel, Carnegie Mellon University  
Zeume, Stefan, University of Michigan  
Zhan, Dongyuan, University College London  
Zhan, Xintong, Chinese University of Hong Kong  
Zhang, Hongkai, Pandora Media  
Zhang, Mandy, University of Sydney  
Zhang, Yunqi , Nankai University  
Zhang, Bin, University of Arizona  
Zhang, Bohui, Chinese University of Hong Kong  
Zhang, Can, Duke University  
Zhang, Chendi, University of Exeter  
Zhang, Dake, University of Chicago  
Zhang, Dan, University of Colorado Boulder  
Zhang, Daying, University of Wisconsin-Madison  
Zhang, Dennis, Washington University in St Louis  
Zhang, Evelyn, University of Toronto  
Zhang, Fan, Stanford University  
Zhang, Feng, University of Utah  
Zhang, Frank, Yale University  
Zhang, Gaiyan, University of Missouri-St. Louis  
Zhang, Gaoqing, University of Minnesota  
Zhang, Hao, Rochester Institute of Technology  
Zhang, Hao, University of British Columbia  
Zhang, Heng, Arizona State University  
Zhang, Hong, Tsinghua University  
Zhang, Hongtao, Hong Kong University of Science and Technology  
Zhang, Huai, Nanyang Technological University  
Zhang, Huanan, University of Colorado Boulder  
Zhang, Ivy, University of California, Riverside  
Zhang, James, University of Texas at Dallas  
Zhang, Jane, Hong Kong University of Science and Technology  
Zhang, Jean, Virginia Commonwealth University  
Zhang, Jenny, University of British Columbia  
Zhang, Jian, Hong Kong Baptist University  
Zhang, Jiding, University of Pennsylvania  
Zhang, Jie, University of Texas at Arlington  
Zhang, Jieying, University of Texas at Dallas  
Zhang, Jiheng, Hong Kong University of Science and Technology  
Zhang, Jin, Monash University

Zhang, Jingjing, Indiana University  
Zhang, Jingjing, McGill University  
Zhang, Juan, National Association of Insurance Commissioners  
Zhang, Juanjuan, Massachusetts Institute of Technology  
Zhang, Kunpeng, University of Maryland, College Park  
Zhang, Laurina, Boston University  
Zhang, Le, MGSM Experimental Economics Laboratory  
Zhang, Lei, University of South Florida  
Zhang, Letian, Harvard University  
Zhang, Liandong, Singapore Management University  
Zhang, Miao, University of Southern California  
Zhang, Ning, Queen's University  
Zhang, Renyu, New York University Shanghai  
Zhang, Ruishen, Shanghai University of Finance and Economics  
Zhang, Shengxing, London School of Economics and Political Science  
Zhang, Shunyuan, Harvard Business School  
Zhang, Tianyu, Chinese University of Hong Kong  
Zhang, Wei, University of Hong Kong  
Zhang, Weina, National University of Singapore  
Zhang, Wen, Baylor University  
Zhang, Wenchang, Indiana University Bloomington  
Zhang, Wenli , Iowa State University  
Zhang, Wenrui, Chinese University of Hong Kong  
Zhang, Xiaowei, University of Hong Kong  
Zhang, Xin, Sveriges Riksbank  
Zhang, Xinyu, Chinese Academy of Sciences  
Zhang, Xubing, Hong Kong Polytechnic University  
Zhang, Ying Evelyn, University of Toronto  
Zhang, Yinghao, University of Cincinnati  
Zhang, Yingjie, University of Texas at Dallas  
Zhang, Yinglei, Chinese University of Hong Kong  
Zhang, Yong, Hong Kong Polytechnic University  
Zhang, Yuan, University of Texas at Dallas  
Zhang, Yue, Pennsylvania State University  
Zhang, Yun, George Washington University  
Zhang, Yuzhao, Rutgers University  
Zhang, Zelin, Renmin University of China  
Zhang, Zhe, Carnegie Mellon University  
Zhang, Zhe, Singapore Management University  
Zhang, Zhe, University of Texas at Dallas  
Zhao, Eric, Indiana University  
Zhao, Hui, Pennsylvania State University  
Zhao, Jake, Peking University  
Zhao, Kang , University of Iowa  
Zhao, Long, National University of Singapore  
Zhao, Mengxin, U.S. Securities and Exchange Commission  
Zhao, Michael, Massachusetts Institute of Technology  
Zhao, Minyuan, Washington University in St Louis

Zhao, Wenhui, Shanghai Jiao Tong University  
Zhao, Wuyang, University of Texas at Austin  
Zhao, Xiaofei, Georgetown University  
Zhao, Xiaojian, Chinese University of Hong Kong  
Zhao, Xinyu, Johns Hopkins University  
Zhao, Xuan, Wilfrid Laurier University  
Zhao, Ying, Hong Kong University of Science and Technology  
Zhdanov, Alexei, Pennsylvania State University  
Zhelyazkov, Pavel, Hong Kong University of Science and Technology  
Zheng, Fanyin, Columbia University  
Zheng, Huanhuan, Chinese University of Hong Kong  
Zheng, Jiakun, Renmin University of China  
Zheng, Jie, Tsinghua University  
Zheng, Jinyang, Purdue University  
Zheng, Ronghuo, University of Texas at Austin  
Zheng, Xinhua, Hong Kong University of Science and Technology  
Zheng, Yanchong, Massachusetts Institute of Technology  
Zheng, Zeyu, University of California, Berkeley  
Zheng, Zhichao, Singapore Management University  
Zhong, Hongda, London School of Economics and Political Science  
Zhong, Songfa, National University of Singapore  
Zhong, Yuan, University of Chicago  
Zhong, Zachary, University of Toronto  
Zhong, Zhaodong, Rutgers University  
Zhou, Angela, Cornell University  
Zhou, Bobby, University of Maryland, College Park  
Zhou, Dexin, Emory University  
Zhou, Flora, Bentley University  
Zhou, Frank, University of Pennsylvania  
Zhou, Guanyu, University of Pennsylvania  
Zhou, Guofu, Washington University in St. Louis  
Zhou, Jian, University of Hawaii  
Zhou, Jidong, Yale University  
Zhou, Jing, University of North Carolina at Charlotte  
Zhou, Maggie, University of Michigan  
Zhou, Mi, UBC Sauder  
Zhou, Xing, Federal Reserve Board  
Zhou, Yangfang, Singapore Management University  
Zhou, Yiyi, Stony Brook University  
Zhou, Yuqing, University of California, Los Angeles  
Zhou, Zhengyuan, Stanford University  
Zhu, Chenqi, University of California, Irvine  
Zhu, Christina, University of Pennsylvania  
Zhu, David, Arizona State University  
Zhu, Feng, Harvard University  
Zhu, Hongjia, Jinan University  
Zhu, Hongyi, University of Texas at San Antonio  
Zhu, Lingjiong, Florida State University

Zhu, PengCheng, University of San Diego  
Zhu, Qifei, Nanyang Technological University  
Zhu, Ting, Purdue University  
Zhu, Weiming, University of Navarra  
Zhu, Yi, University of Minnesota  
Zhuang, Jun, University at Buffalo-The State University of New York  
Zia, Mohammad, Chapman University  
Zimmermann, Florian, University of Bonn  
Zitzewitz, Eric, Dartmouth College  
Zoelitz, Ulf, University of Zurich  
Zoican, Marius, University of Toronto  
Zorc, Sasa, University of Virginia  
Zou, Hong, University of Hong Kong  
Zou, Tianxin, University of Florida  
Zou, Xin, Hong Kong Baptist University  
Zou, Youli, University of Connecticut  
Zoumpoulis, Spyros, INSEAD  
Zryumov, Pavel, University of Rochester  
Zubanov, Nick, University of Constance  
Zubcsek, Peter Pal, Tel Aviv University  
Zucchi, Francesca, Federal Reserve Board  
Zuo, Luo, Cornell University  
Zuo, Song, Google Research  
Zviadadze, Irina , HEC Paris
